# Supplementary material for: Genomic insights into adaptive divergence and genetic vulnerability to climate change of the medicinal plant Isodon rubescens (Hemsl.) H. Hara in central China
Source: Research Square preprint supplement (doi:10.21203/rs.3.rs-8136960/v1), 2025-12-02
Supplement: Supplementary file 1 [file 81df80b68583edeb521fe50b.docx]

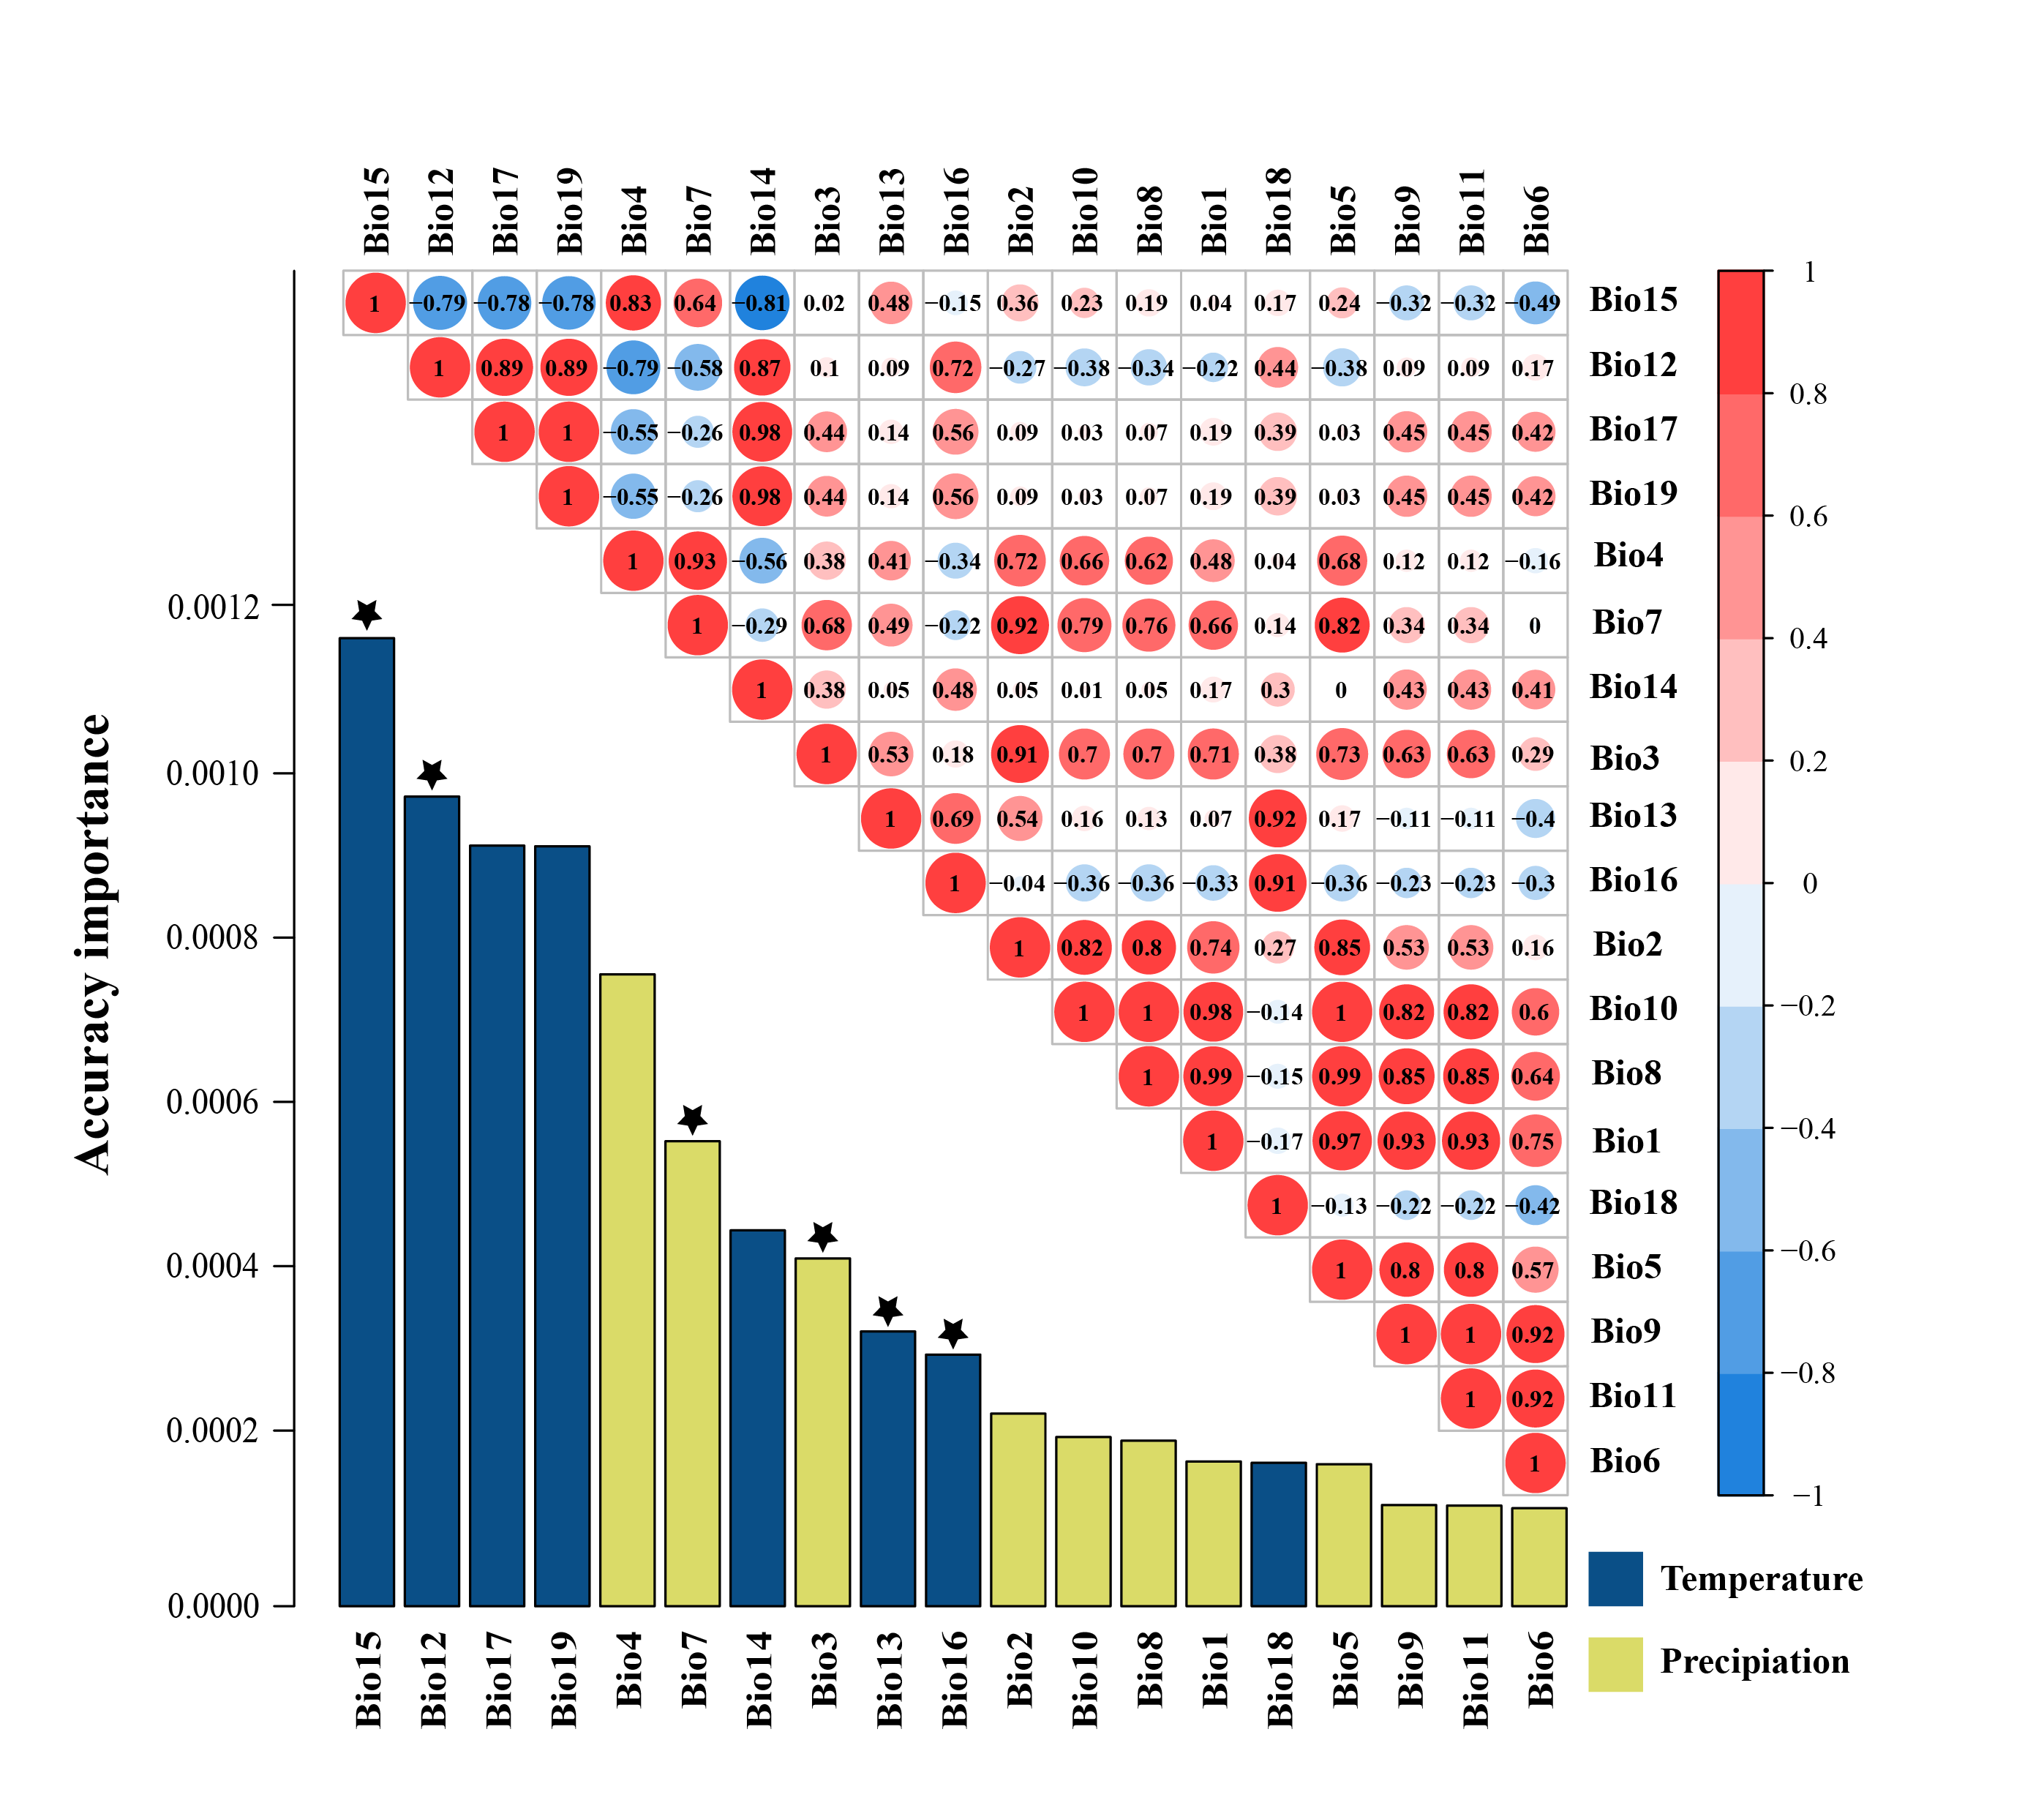


**Fig. S1.** Ranked importance of 19 environmental variables based on gradient forest analysis (below the diagonal), and Pearson's correlation coefficient between these variables (above the diagonal). Asterisks (*) denote the six highest-ranked and uncorrelated environmental variables (Pearson's | r | < 0.8).


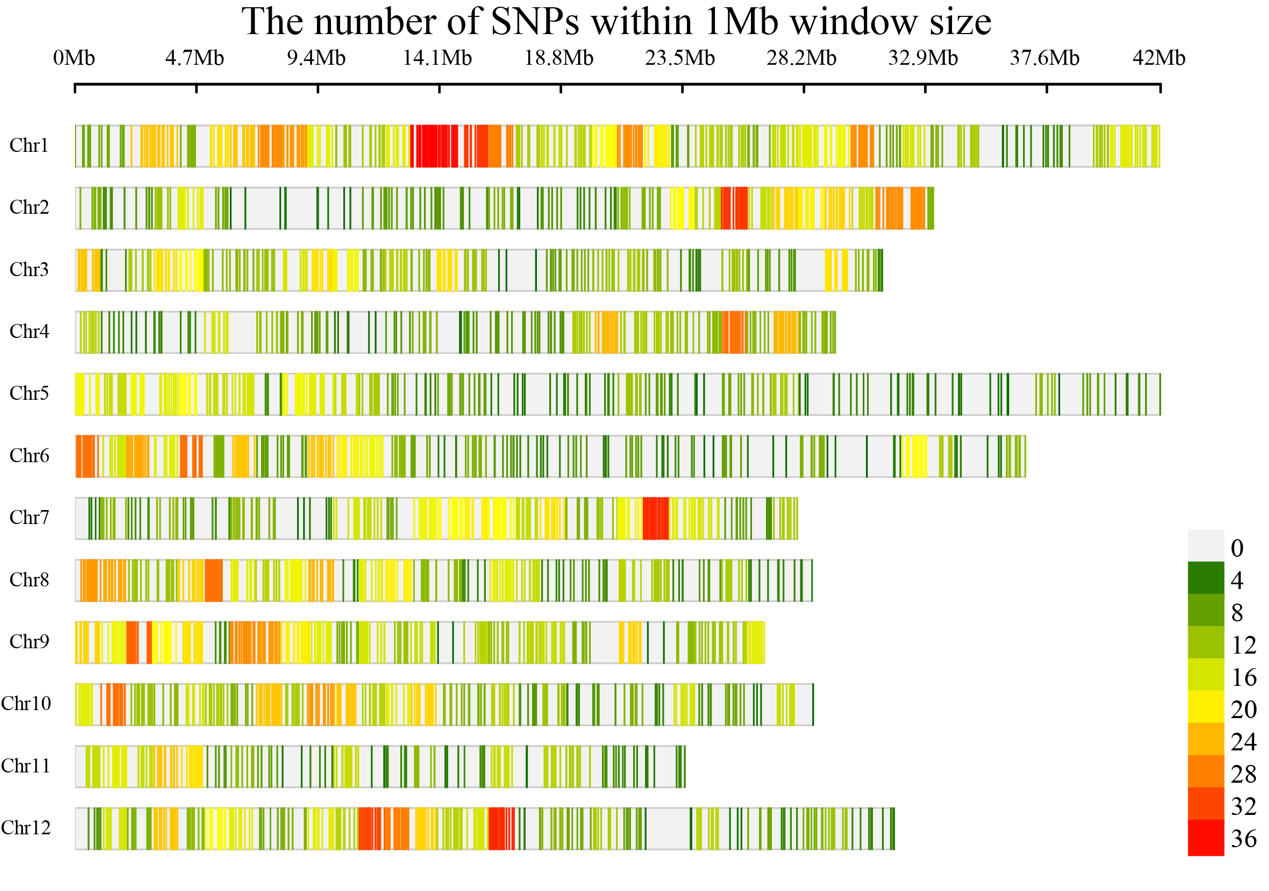


**Fig. S2.** SNP distribution in *Isodon rubescens*, summarized in 1 Mb windows. Chromosomes (Chr1–Chr12) are arranged horizontally, with the x-axis denoting genomic position (Mb). Color intensity indicates the number of SNPs per window (scale: 0–36).


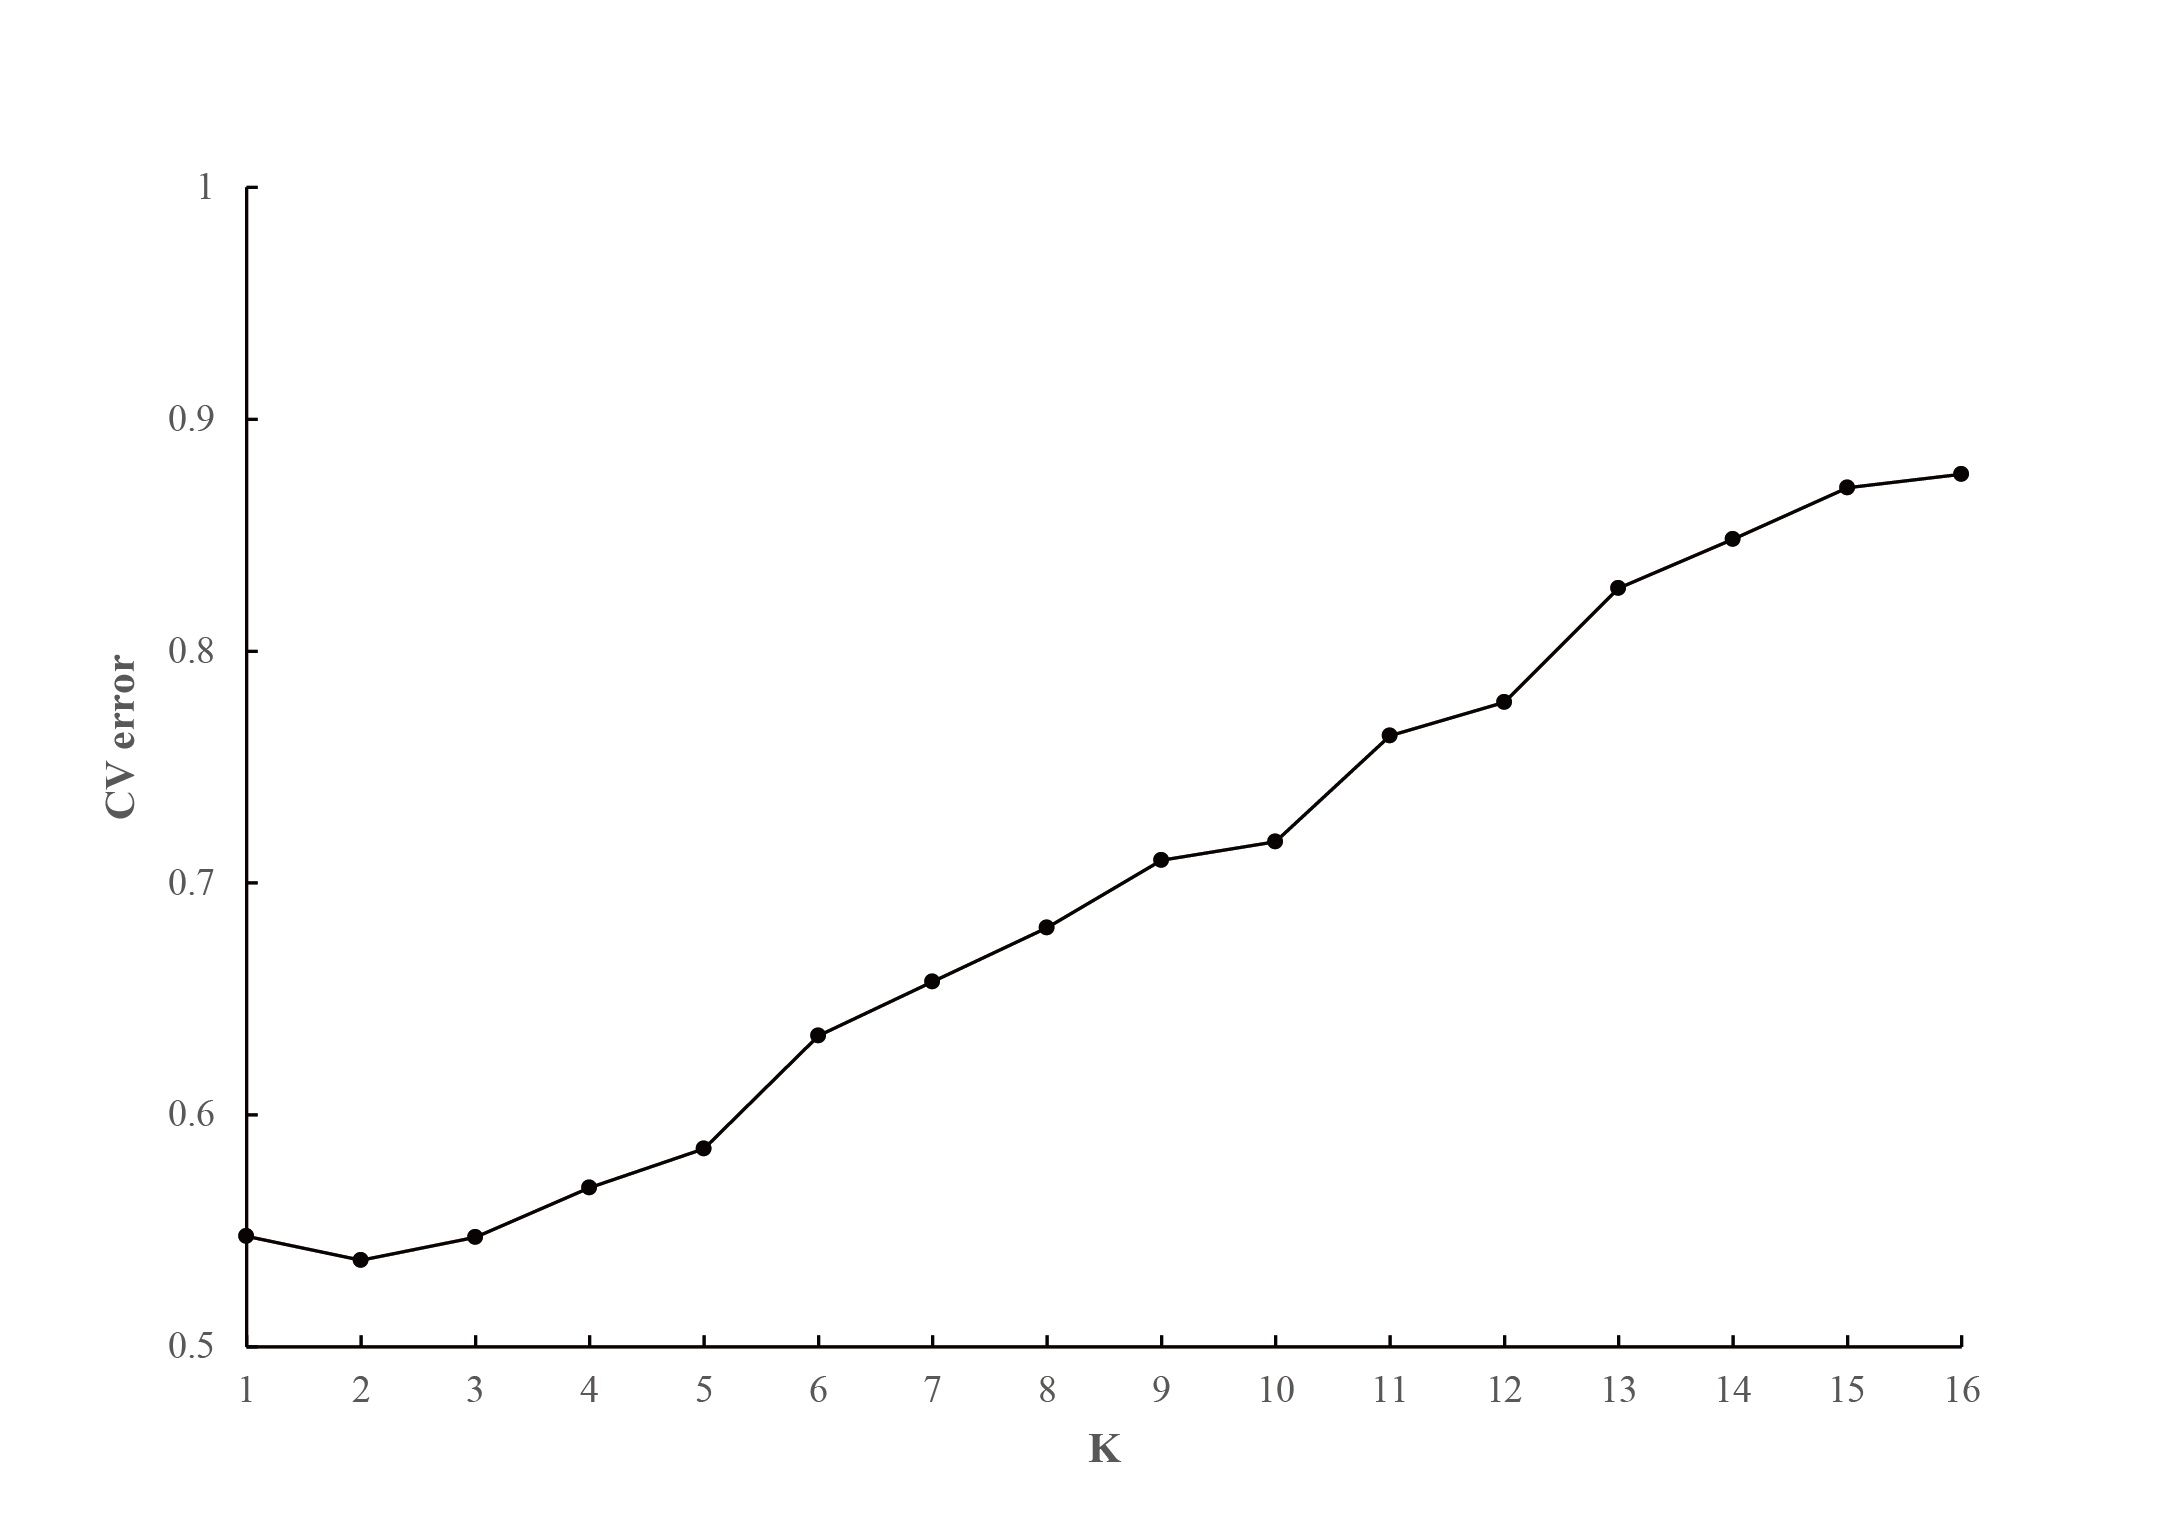


**Fig. S3.** Cross-validation errors for various *K* values in ADMIXTURE analyses.


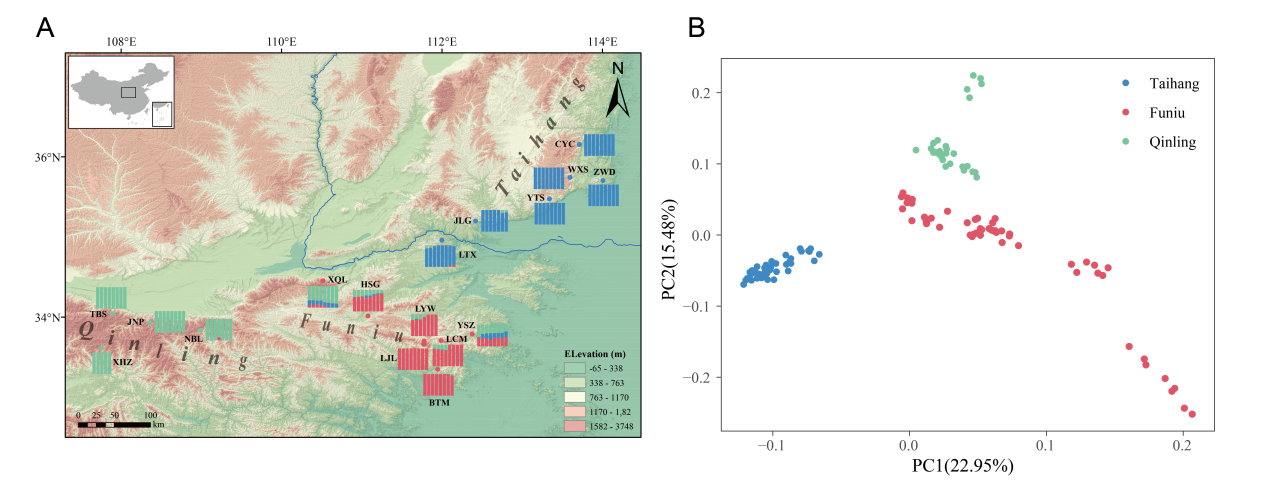


**Fig. S4.** Population genetic structure of *Isodon rubescens*. (A) Sampling distribution map and population structure for the 130 *I. rubescens* individuals based on ADMIXTURE analysis (*K* = 3), where each bar represents an individual. (B) PCA plot for *I. rubescens*.


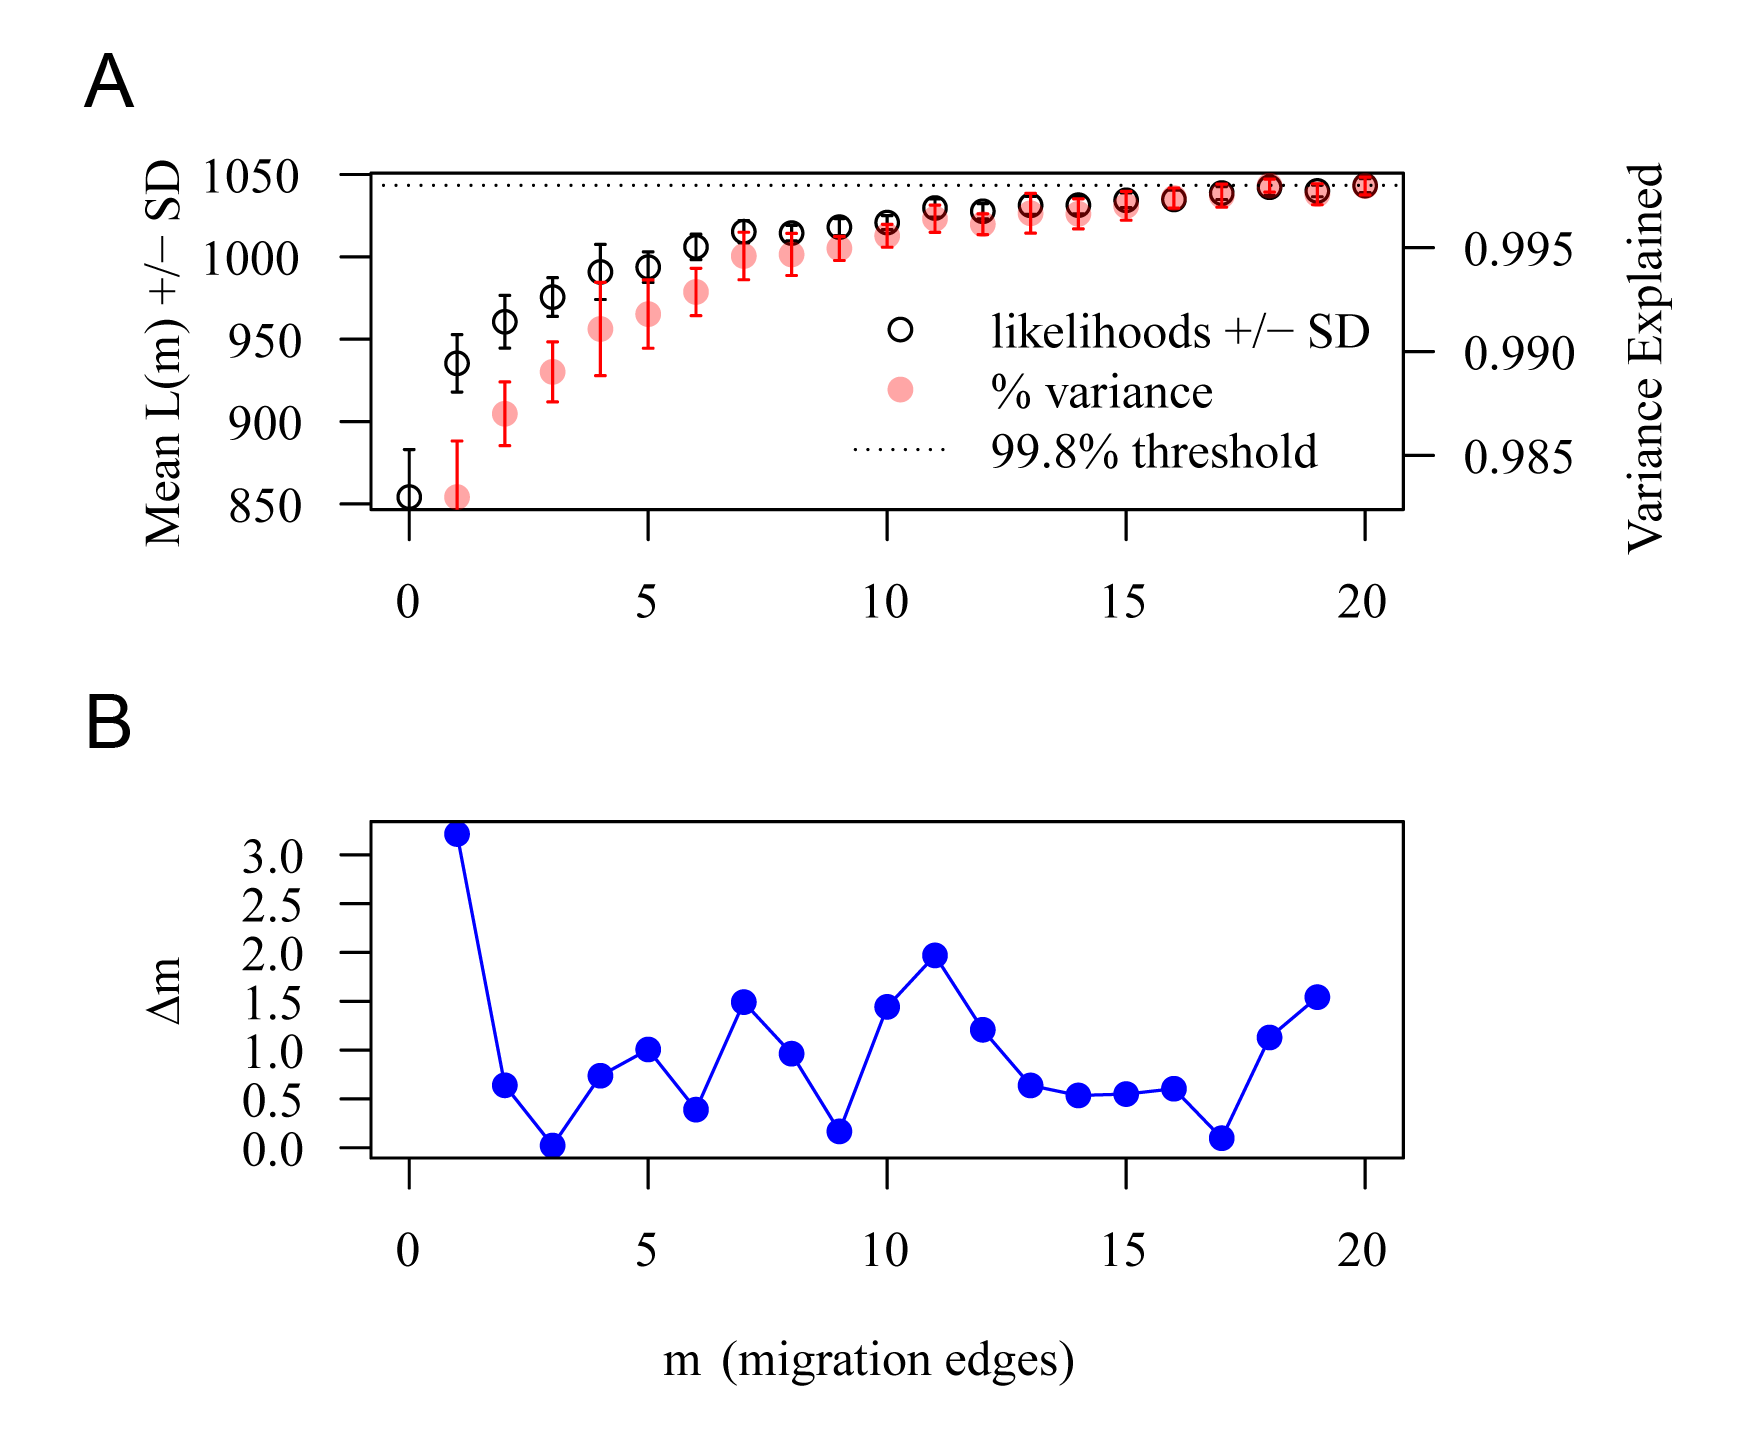


**Fig. S5.** The output generated by *OptM*. (A) The mean and SD of the composite likelihood L(*m*) (left axis, black circles) and the proportion of variance explained (right axis, red circles). The 99.8% threshold (horizontal dotted line) represents the recommendation by Pickrell and Pritchard (2012). (B) The second-order rate of change (Δ*m*) across varying values of *m*.


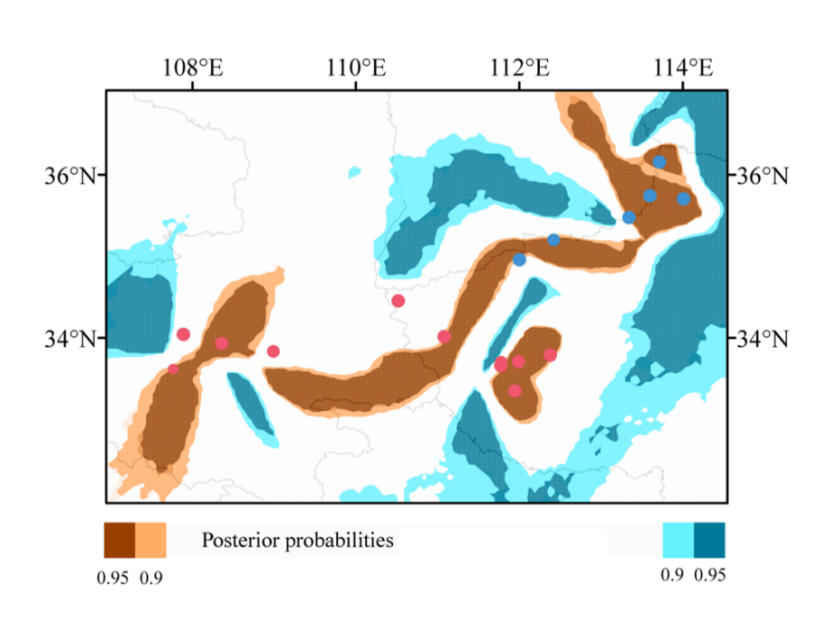


**Fig. S6.** Posterior probabilities of estimated effective migration surface in *Isodon rubescens*. Brown and blue contours indicate regions of low and high relative migration, respectively, supported by posterior probabilities exceeding 0.9.


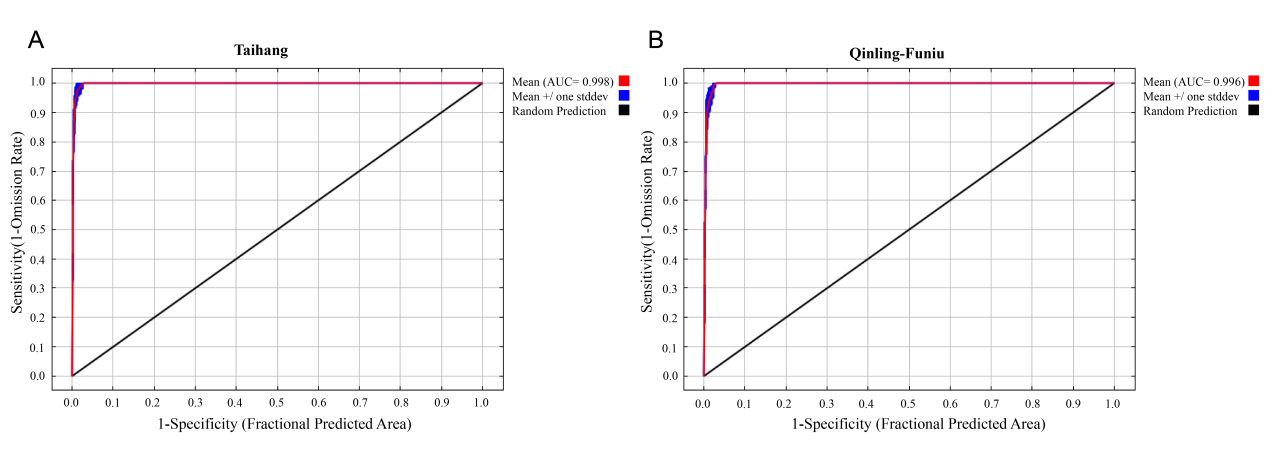


**Fig. S7.** The receiver operating characteristic curve (AUC) of the distribution model for the Taihang group (A) and the Qinling-Funiu group (B).


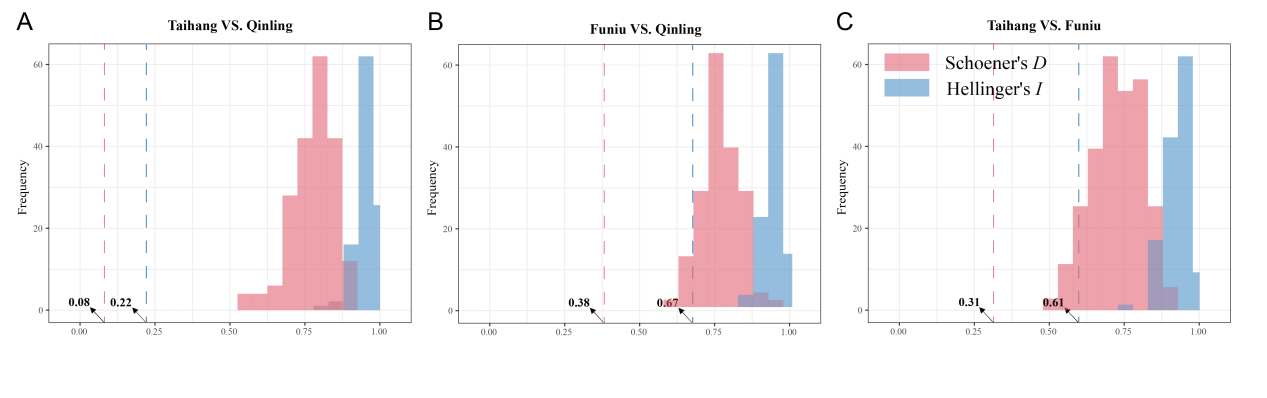


**Fig. S8.** Niche identity tests between pairs of the three groups (Taihang, Qinling and Funiu) of *Isodon rubescens*. The red bars depict the null distributions of Schoener's *D*, while the blue bars represent Hellinger's distance (*I*). The arrows indicate the values of *D* and *I* in Maxent analyses.


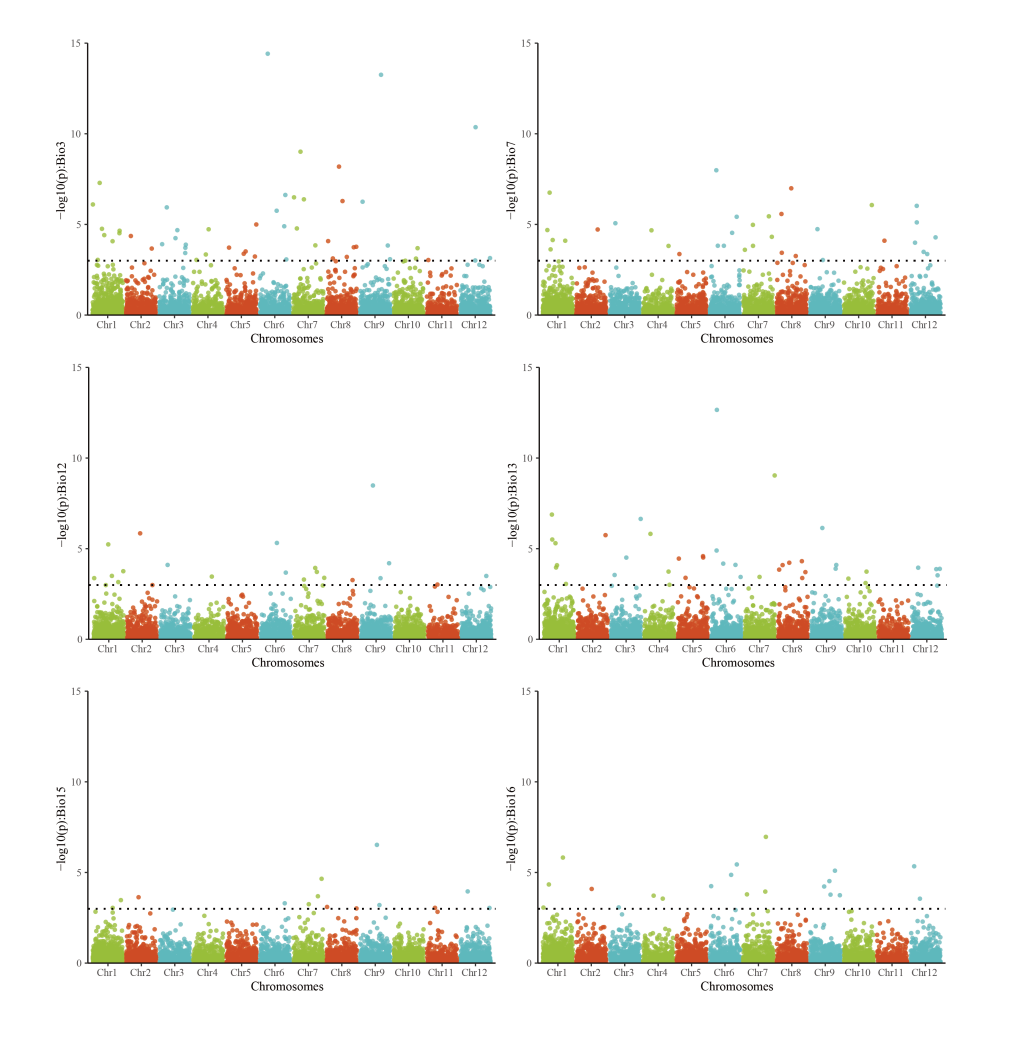


**Fig. S9.** Manhattan plots depicting outlier SNPs identified through latent factor mixed modelling (LFMM) with the six environmental variables. The black dashed horizontal lines represent the significance threshold (*p* = 1 × 10-3).


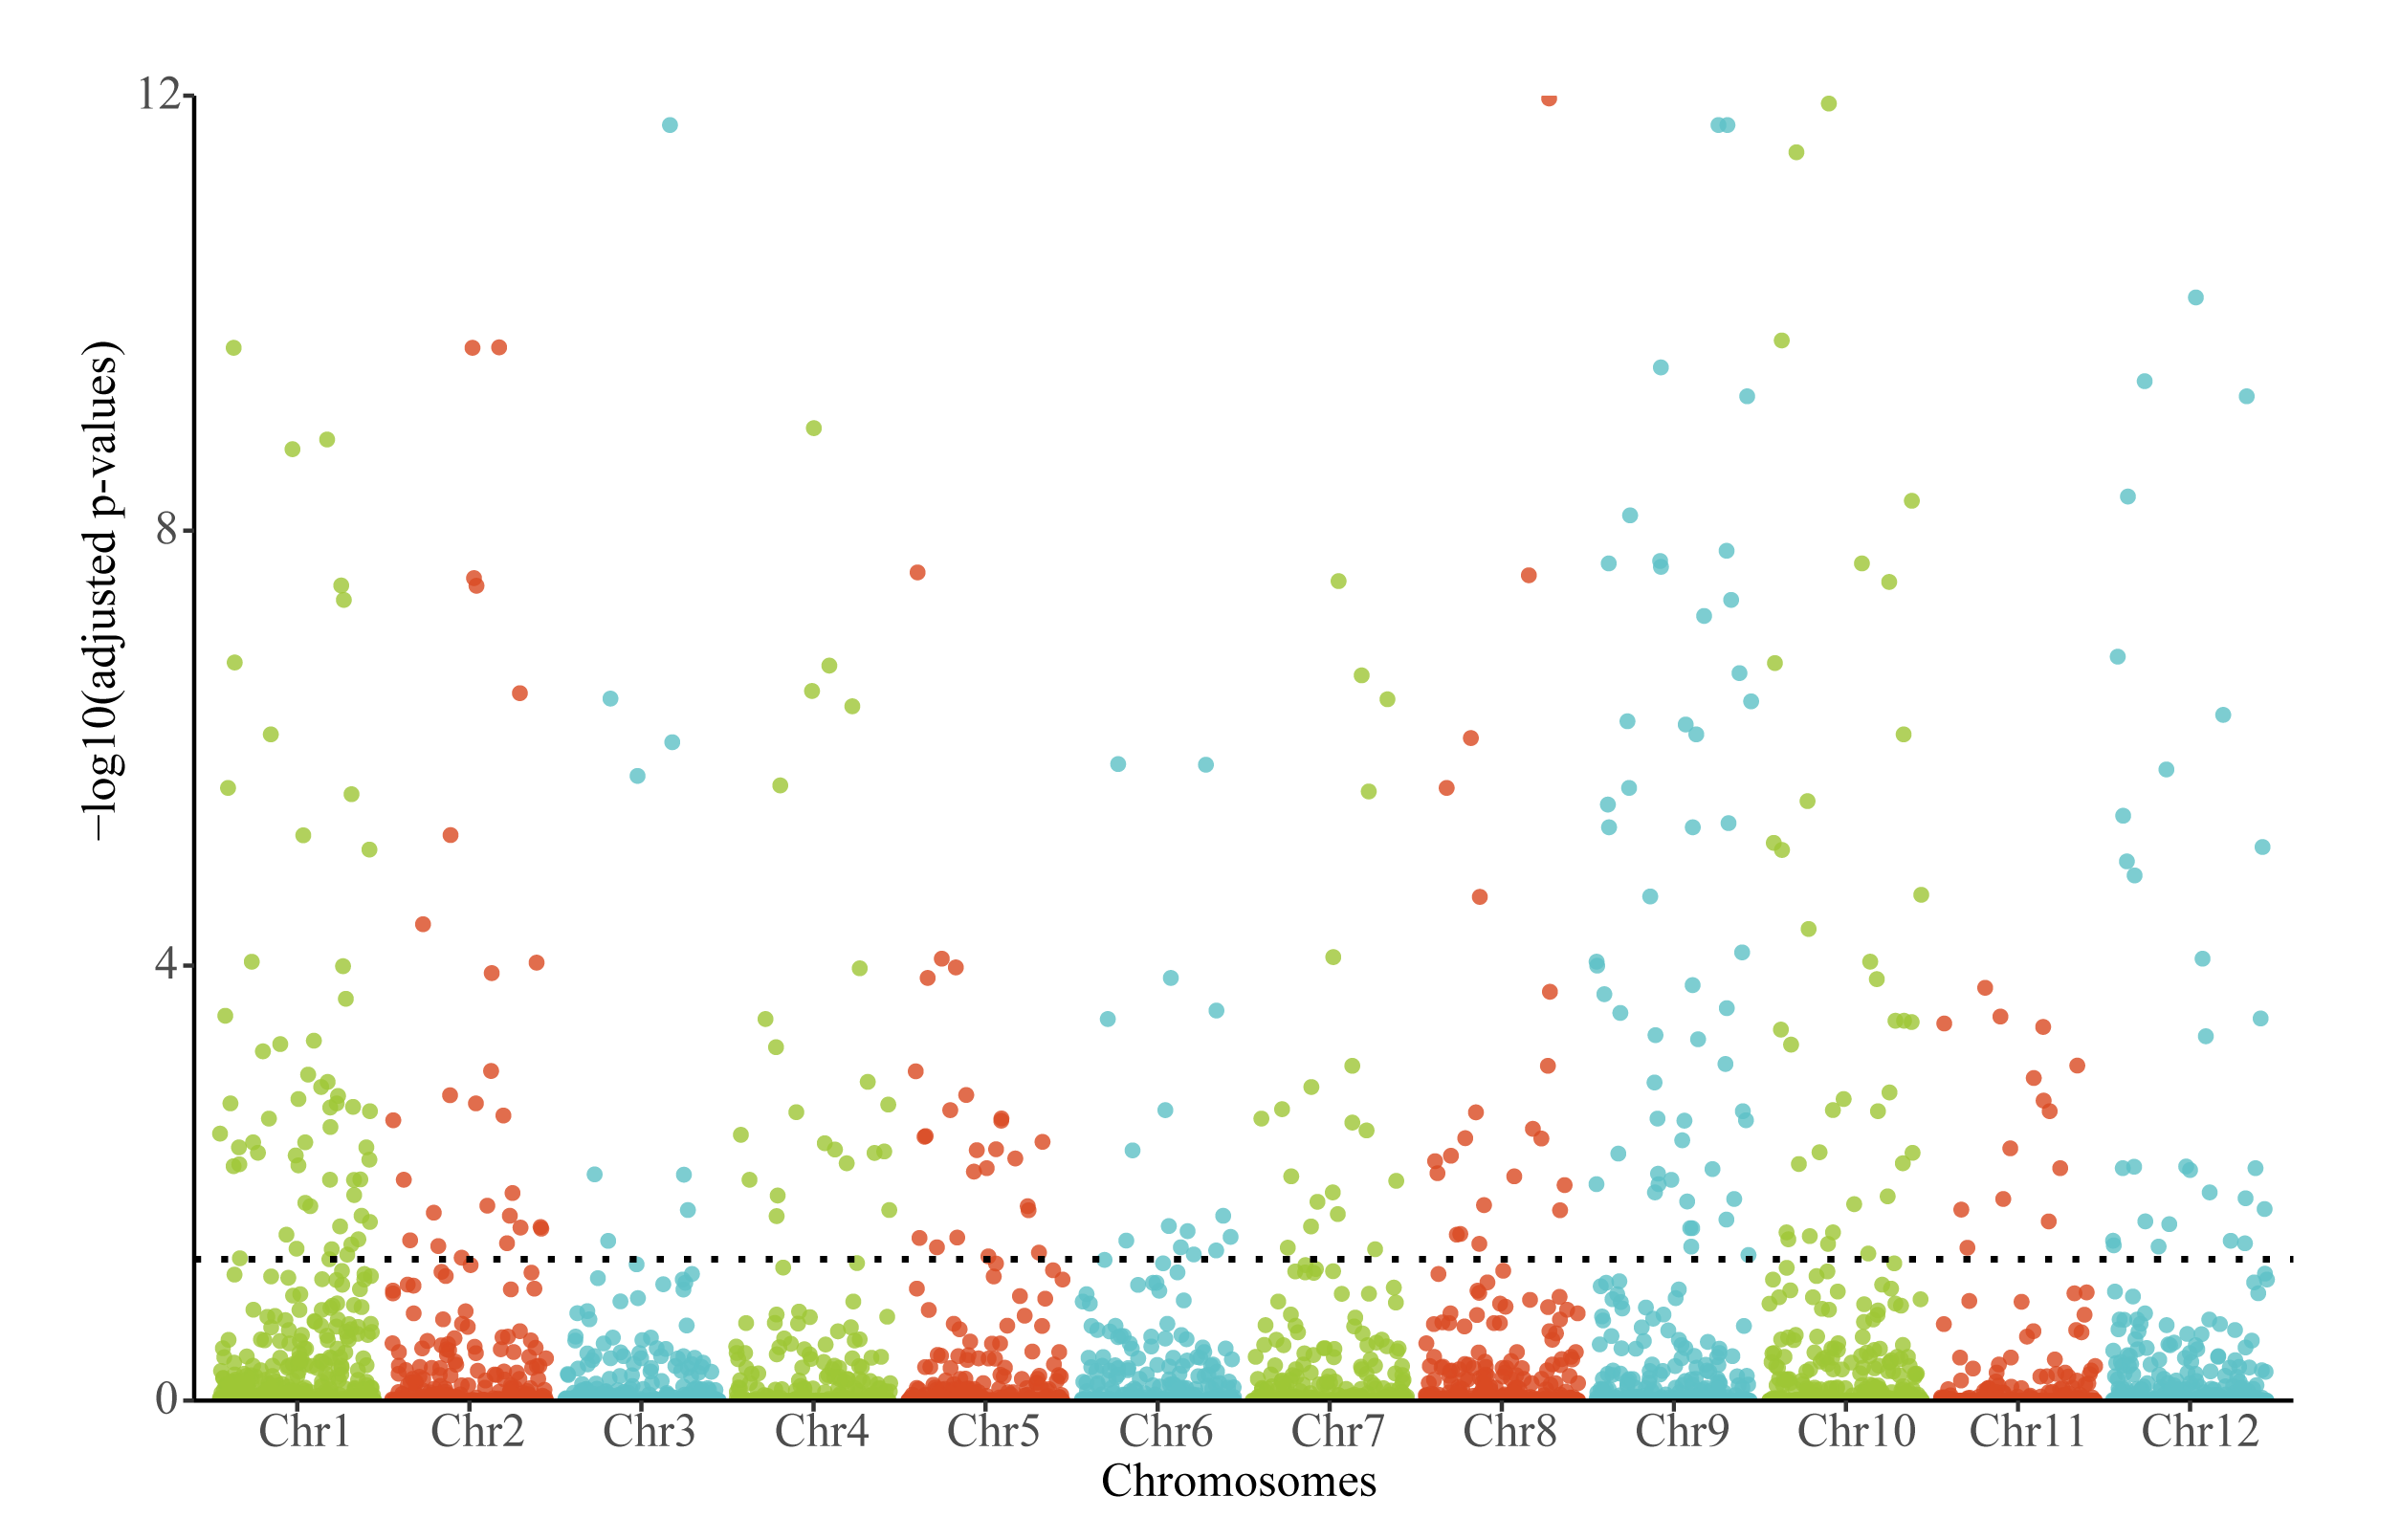


**Fig. S10.** Manhattan plot of outlier SNPs identified by PCAdapt.


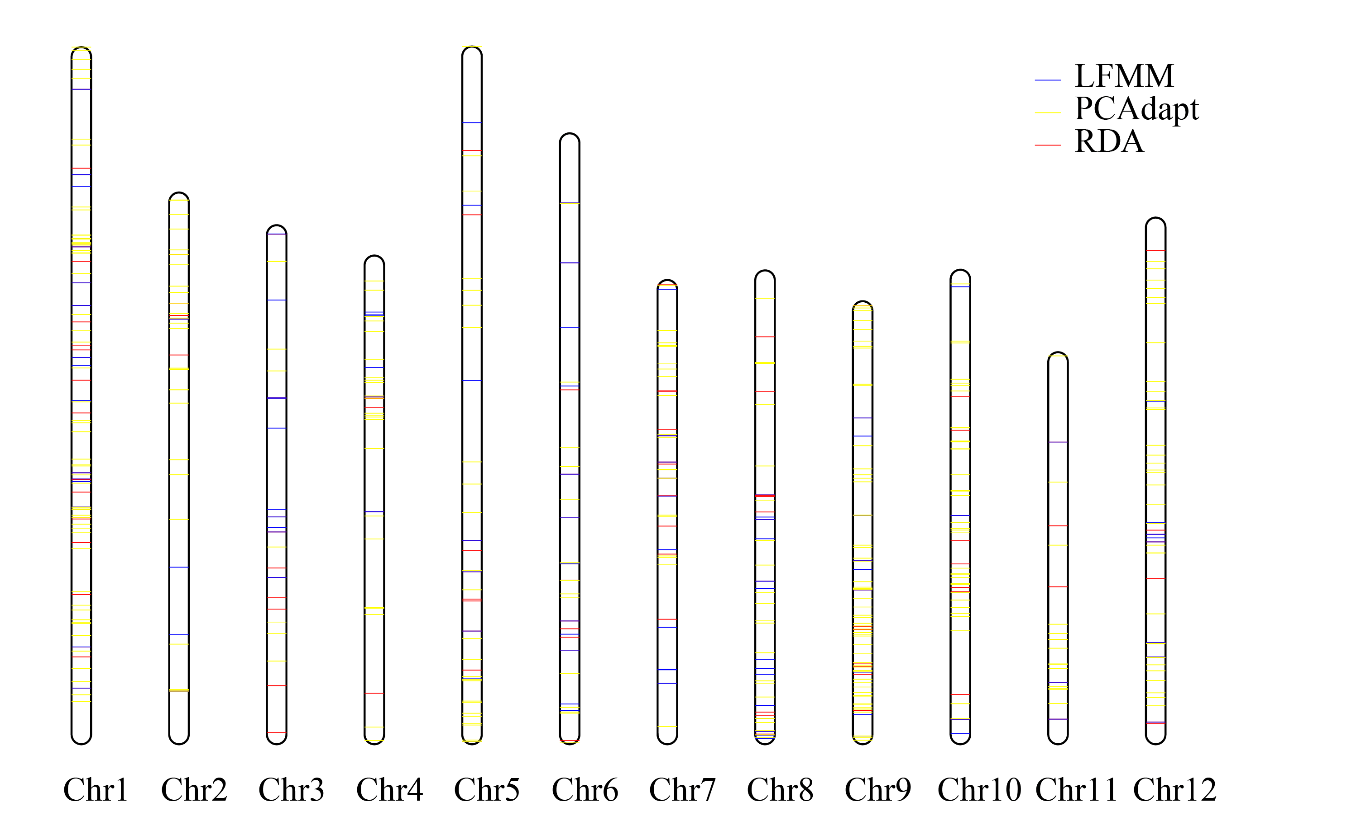


**Fig. S11.** Genomic positions of the 456 outlier SNPs detected by at least one of the three methods (RDA, LFMM, and PCAdapt). Bars are color-coded: yellow (RDA), blue (LFMM), and red (PCAdapt).


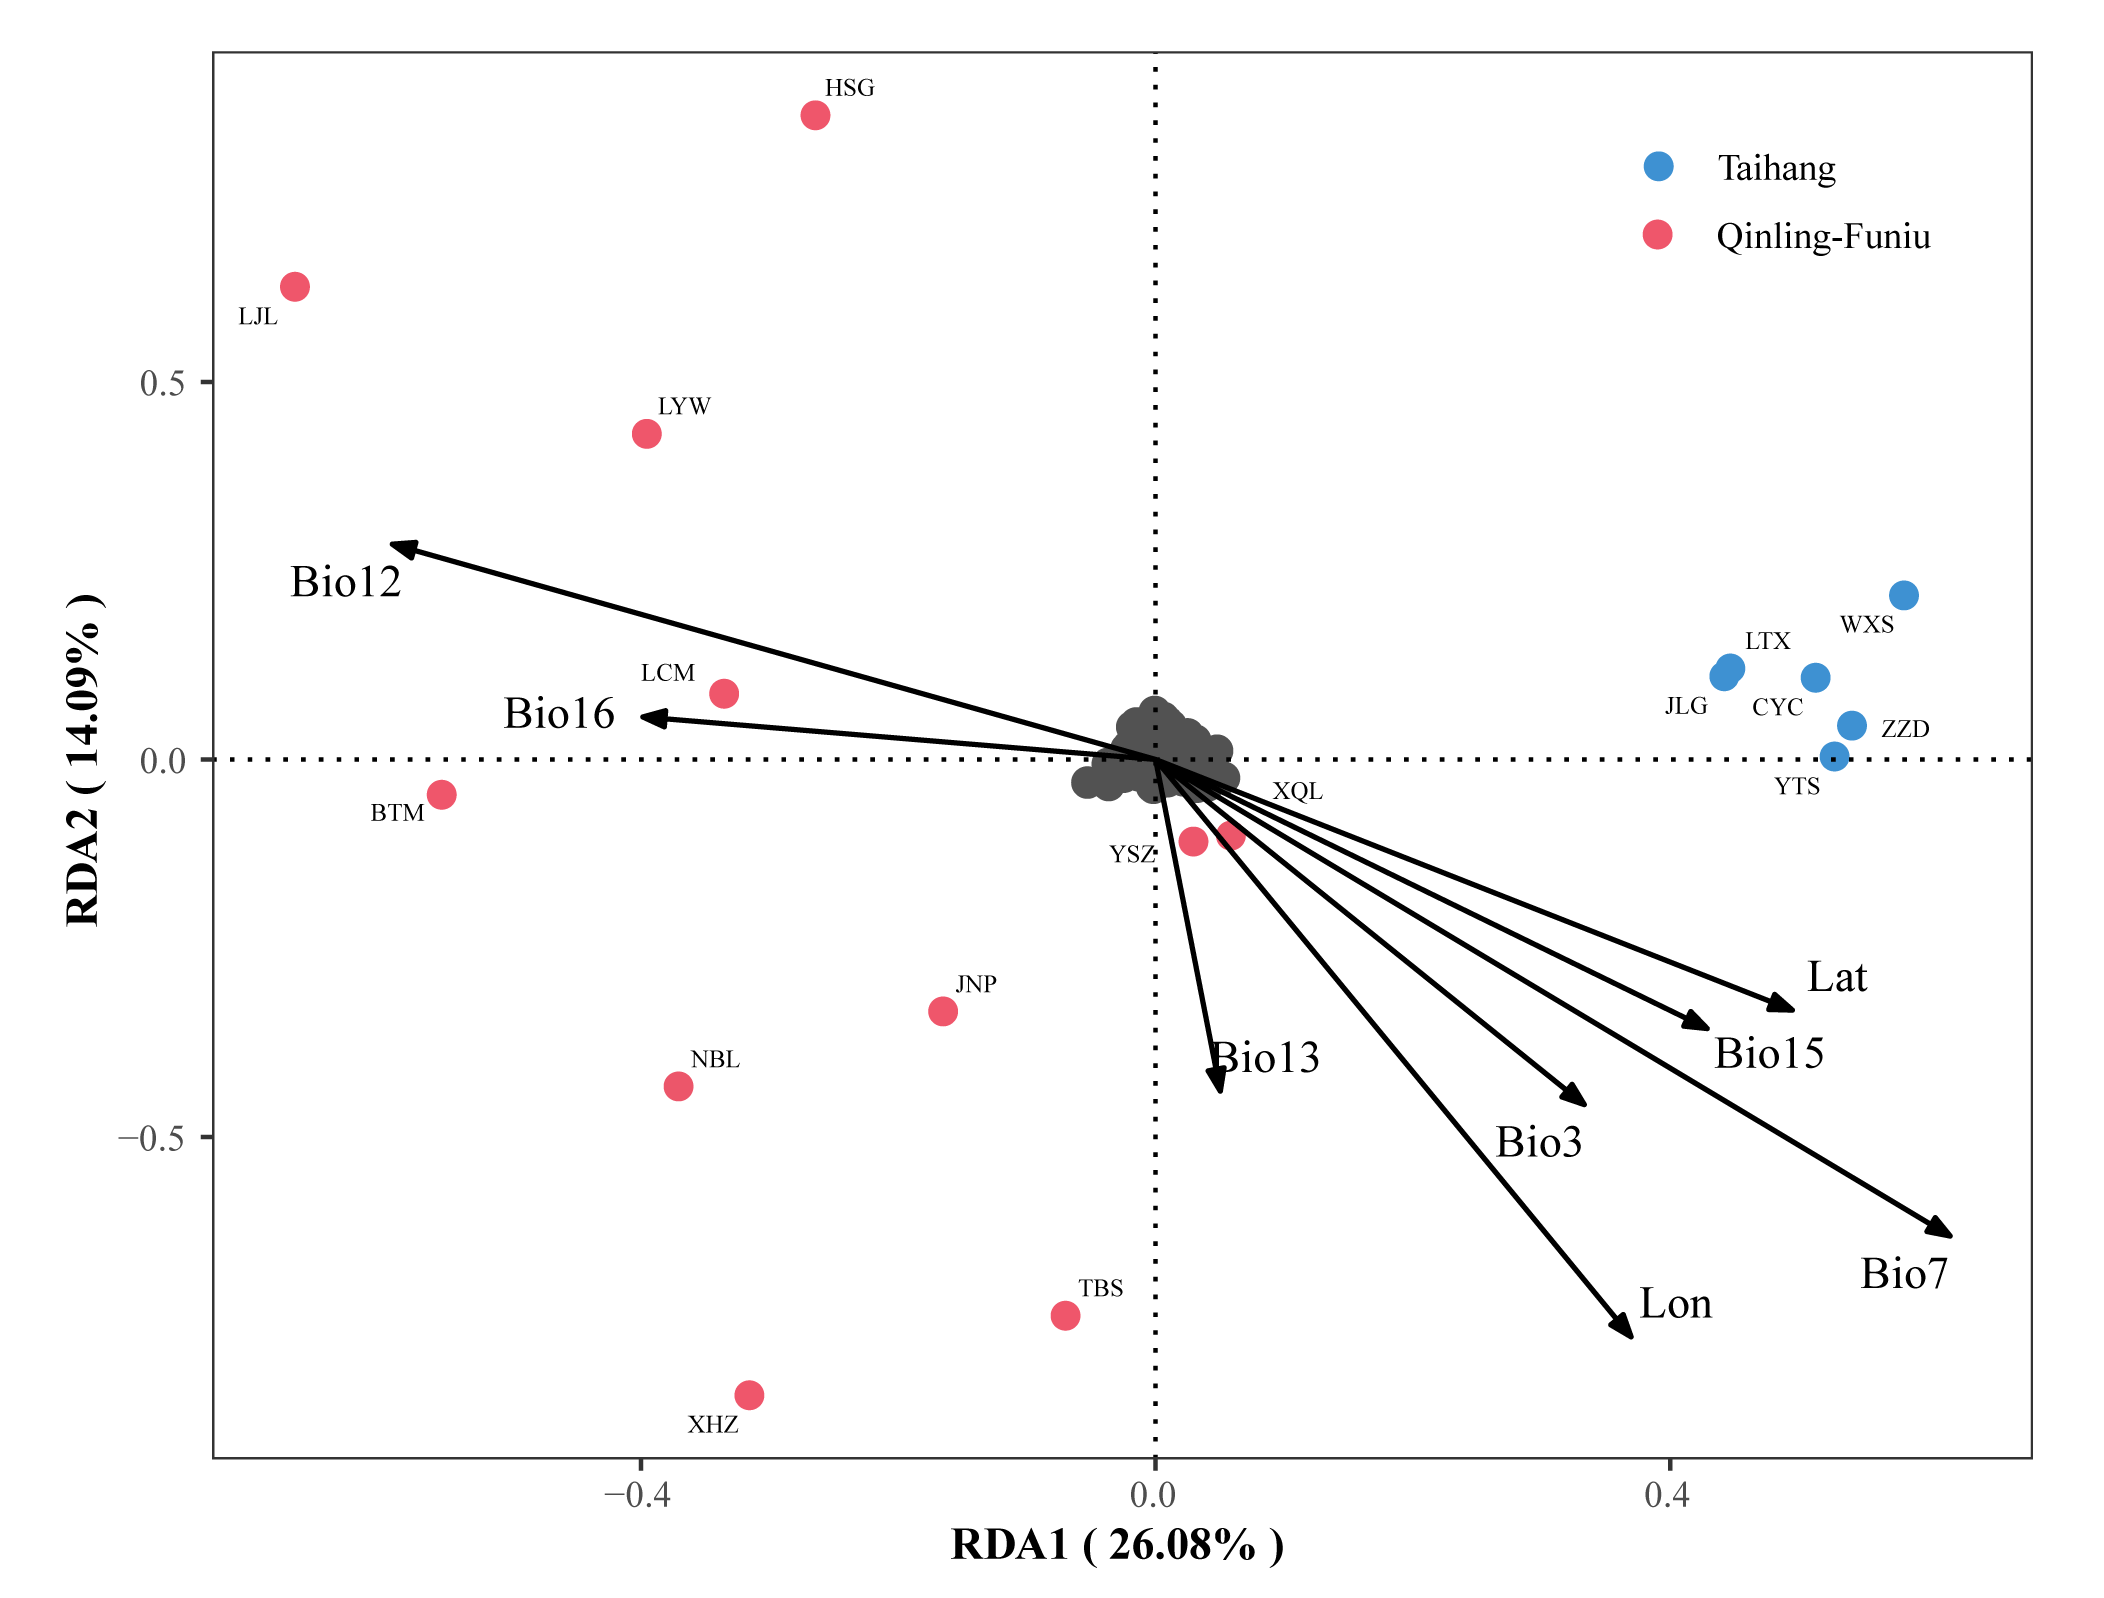


**Fig. S12.** RDA partitioning sources of genetic differentiation among populations in *Isodon rubescens* into environment and geography using all SNPs. The plot illustrates the first and second RDA axes with populations represented as colored circles, environmental and geographical variables as black vectors, and all SNPs as black circles.


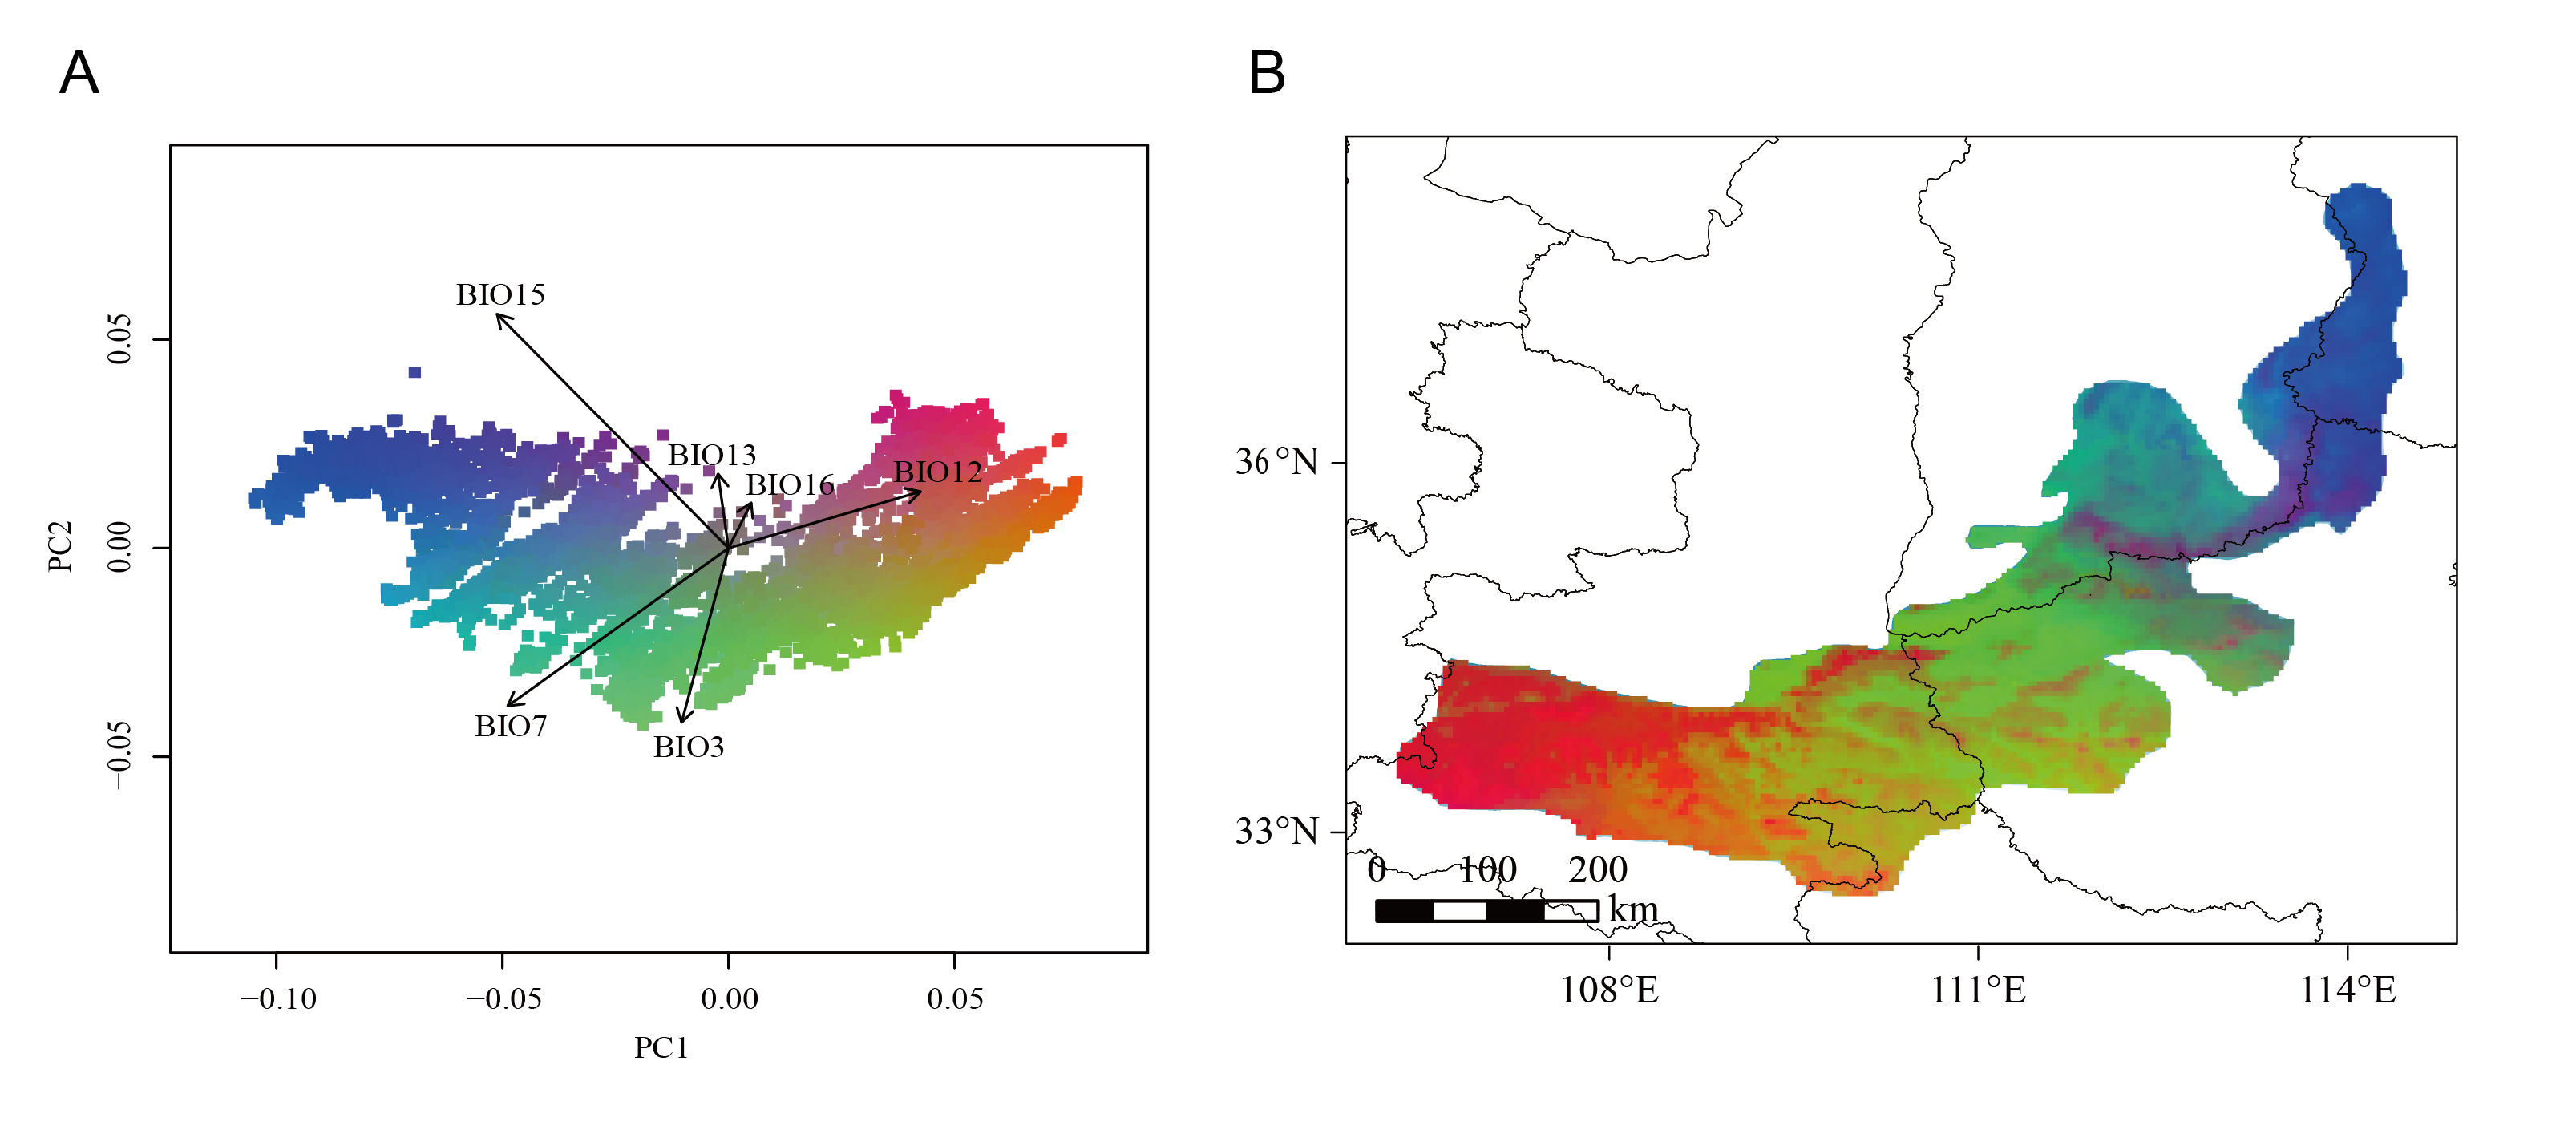


**Fig. S13.** Genotype-environment associations in *Isodon rubescens* derived from GF analysis. (A) PCA biplot of the GF-predicted genetic variation. (B) GF-mapped genotype-environment associations across the distribution range of *I. rubescens*. Colors represent the PCA-summarized gradients in genetic turnover. The first three PCs were assigned to a red-green-blue color scheme. Regions with similar colors are predicted to have comparable genetic compositions.


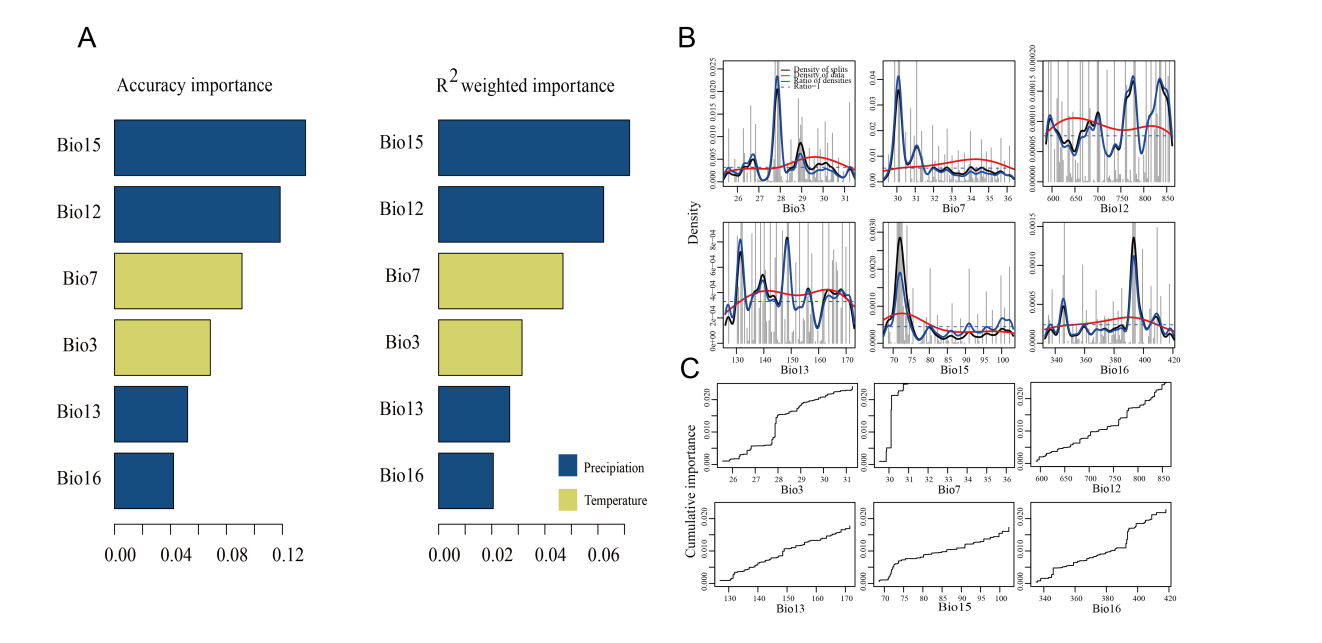


**Fig. S14.** The GF model output for all SNPs for *Isodon rubescens.* (A) Ranked importance of the six environmental variables based on GF analysis. (B) Split density plot of the six environmental variables. (C) Cumulative importance of allelic turnover along environmental gradients.


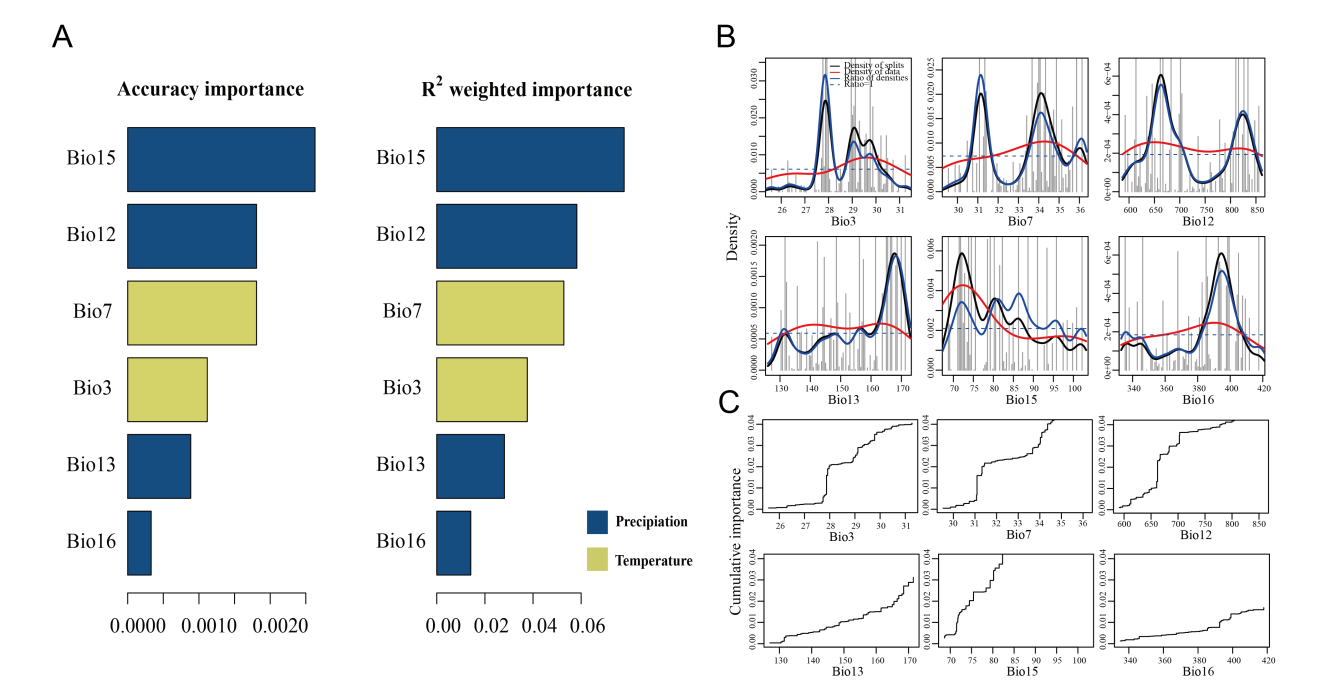


**Fig. S15.** The GF model output for GEA SNPs for *Isodon rubescens.* (A) Ranked importance of the six environmental variables based on GF analysis. (B) Split density graph of the six environmental variables. (C) Cumulative importance of allelic frequency changes along environmental gradients.


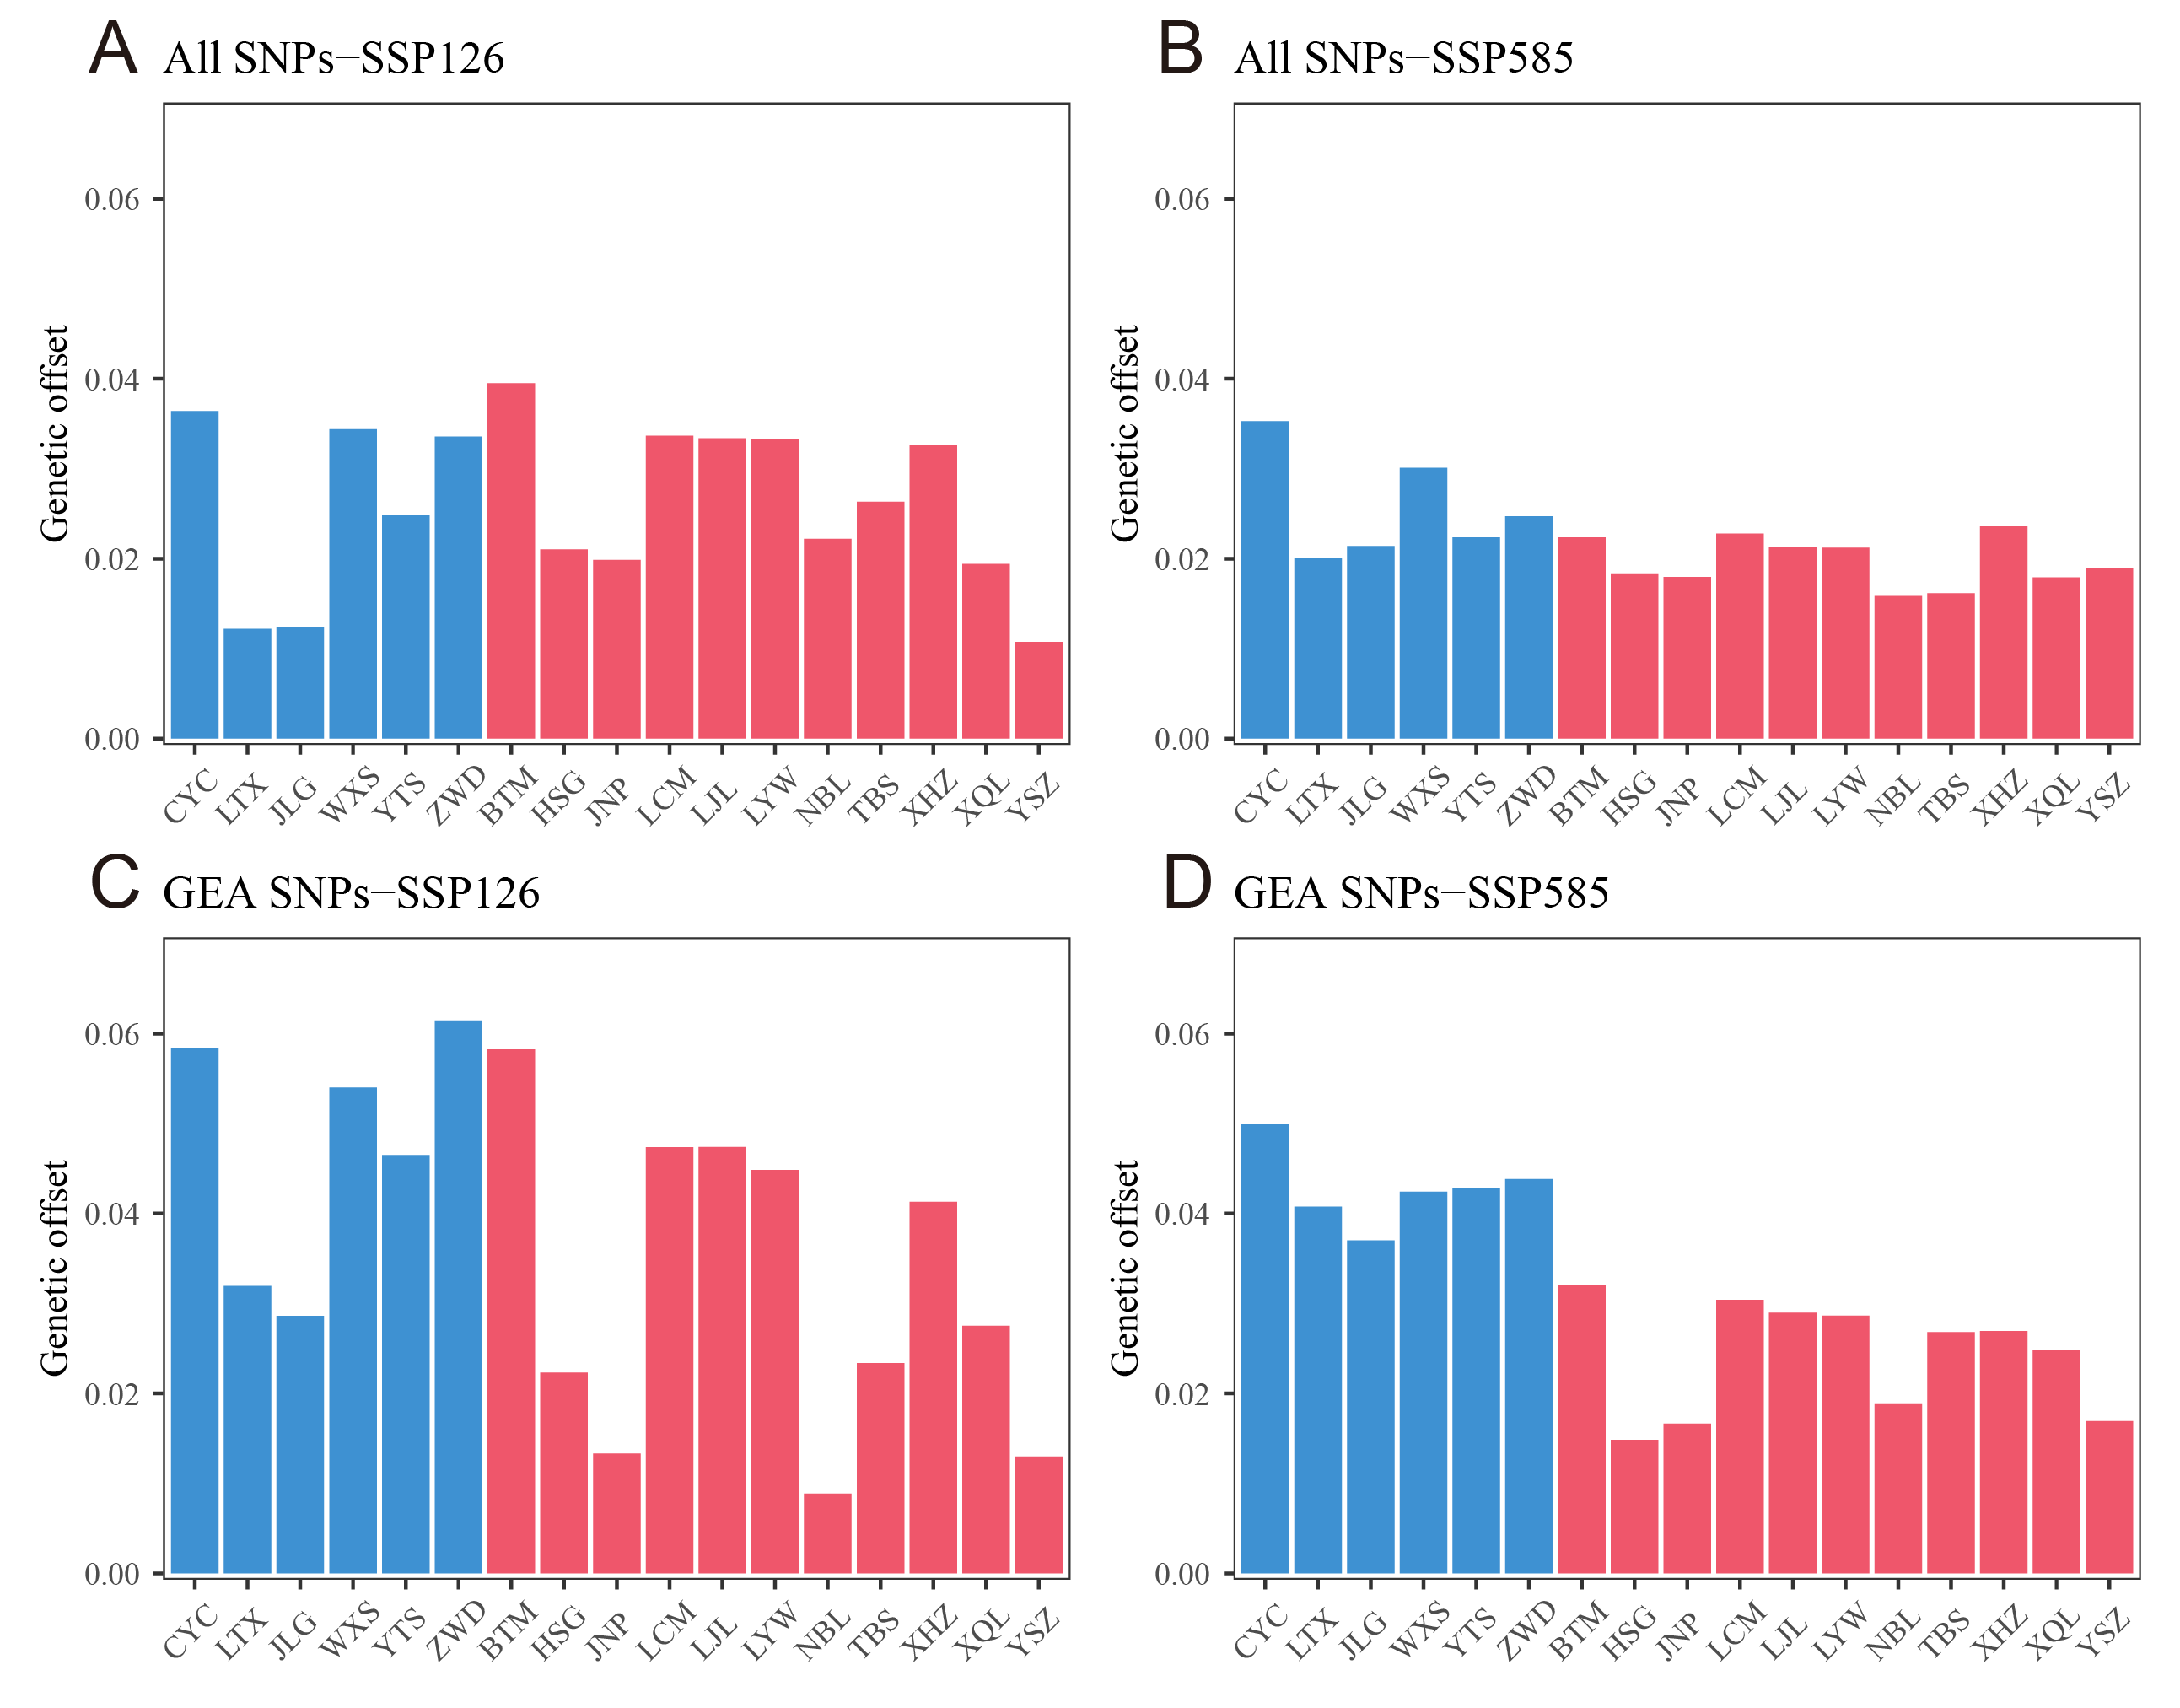


**Fig. S16.** Genomic offset of 17 populations of *Isodon rubescens* under four genetic offset modes. (A) Mode ALL SNPs–SSP126. (B) Mode ALL SNPs–SSP585. (C) Mode GEA SNPs–SSP126. (D) Mode GEA SNPs–SSP585. The bar chart in each panel illustrates the estimated genomic offset for each population. Blue represents the Taihang group, while red represents the Qinling-Funiu group.

**Table S1** Distribution data for Maxent model predictions.

| Group | Longitude | Latitude | Group | Longitude | Latitude |
| --- | --- | --- | --- | --- | --- |
| Taihang | 114.4932 | 37.0683 | Qinling | 107.5266 | 33.8138 |
| Taihang | 114.3614 | 36.4085 | Qinling | 107.7610 | 33.6215 |
| Taihang | 114.1857 | 36.5700 | Qinling | 107.7666 | 32.9831 |
| Taihang | 114.1168 | 35.6422 | Qinling | 107.8882 | 34.4147 |
| Taihang | 114.0283 | 36.8911 | Qinling | 107.8882 | 34.0429 |
| Taihang | 114.0074 | 35.7051 | Qinling | 107.9327 | 33.9160 |
| Taihang | 113.8664 | 36.8131 | Qinling | 107.9900 | 33.5200 |
| Taihang | 113.7202 | 36.5504 | Qinling | 108.0475 | 34.0874 |
| Taihang | 113.7186 | 36.1986 | Qinling | 108.2015 | 33.9810 |
| Taihang | 113.7140 | 36.1553 | Qinling | 108.3538 | 33.9303 |
| Taihang | 113.6962 | 36.0870 | Qinling | 108.5100 | 34.0100 |
| Taihang | 113.6019 | 35.7002 | Qinling | 108.8794 | 34.0364 |
| Taihang | 113.5975 | 35.7431 | Qinling | 108.9859 | 34.0096 |
| Taihang | 113.5806 | 35.6117 | Qinling | 108.9900 | 33.8352 |
| Taihang | 113.5704 | 35.5608 | Qinling | 109.2953 | 34.2702 |
| Taihang | 113.5609 | 35.6477 | Funiu | 110.0415 | 33.4035 |
| Taihang | 113.5445 | 35.5967 | Funiu | 110.0992 | 34.5187 |
| Taihang | 113.3536 | 35.4594 | Funiu | 110.5171 | 34.4540 |
| Taihang | 113.3389 | 35.6016 | Funiu | 110.5774 | 33.3949 |
| Taihang | 113.2350 | 35.4097 | Funiu | 110.9515 | 33.8284 |
| Taihang | 112.8037 | 35.1771 | Funiu | 111.0400 | 34.0500 |
| Taihang | 112.7390 | 35.2141 | Funiu | 111.0496 | 33.7762 |
| Taihang | 112.5881 | 35.0903 | Funiu | 111.0786 | 34.0159 |
| Taihang | 112.5031 | 35.1847 | Funiu | 111.1309 | 34.0264 |
| Taihang | 112.4338 | 35.2009 | Funiu | 111.7719 | 33.6618 |
| Taihang | 112.2667 | 35.0167 | Funiu | 111.7768 | 33.7038 |
| Taihang | 112.0876 | 35.2756 | Funiu | 111.7982 | 33.6301 |
| Taihang | 111.9998 | 34.9590 | Funiu | 111.9463 | 33.5173 |
| Taihang | 111.2000 | 34.7700 | Funiu | 111.9463 | 33.3506 |
| Qinling | 107.2494 | 33.9762 | Funiu | 111.9878 | 33.7078 |
| Qinling | 107.3337 | 33.1568 | Funiu | 112.0376 | 33.9638 |
| Qinling | 107.4978 | 33.6334 | Funiu | 112.3765 | 33.7892 |

**Table S2** All environmental variables collected in this study.

| Environmental variable | Description |
| --- | --- |
| Bio1 | Annual Mean Temperature |
| Bio2 | Mean Diurnal Range |
| Bio3 | Isothermality |
| Bio4 | Temperature Seasonality |
| Bio5 | Max Temperature of Warmest Month |
| Bio6 | Min Temperature of Coldest Month |
| Bio7 | Temperature Annual Range |
| Bio8 | Mean Temperature of Wettest Quarter |
| Bio9 | Mean Temperature of Driest Quarter |
| Bio10 | Mean Temperature of Warmest Quarter |
| Bio11 | Mean Temperature of Coldest Quarter |
| Bio12 | Annual Precipitation |
| Bio13 | Precipitation of Wettest Month |
| Bio14 | Precipitation of Driest Month |
| Bio15 | Precipitation Seasonality |
| Bio16 | Precipitation of Wettest Quarter |
| Bio17 | Precipitation of Driest Quarter |
| Bio18 | Precipitation of Warmest Quarter |
| Bio19 | Precipitation of Coldest Quarter |
| Elevation | Elevation |
| Aspect | Aspect |
| Slope | Slope |
| T_OC | Topsoil Organic Carbon |
| AWC_CLASS | Soil Effective Water Content |
| T_PH | Topsoil pH |
| T_TEXTURE | Topsoil Texture |

Note: Topsil (Top 30cm soil properties).

**Table S3** Summary of statistical information on sequencing data of 130 samples of *Isodon rubescens.*

| Sample | Raw_reads | Raw_base (G) | Clean_reads | Clean_base (G) | Mapping rate (%) | Mean_depth |
| --- | --- | --- | --- | --- | --- | --- |
| BTM12 | 2431028 | 0.365 | 2120467 | 0.318 | 92.95 | 11.23 |
| BTM13 | 2472802 | 0.371 | 2231134 | 0.335 | 93.18 | 11.59 |
| BTM15 | 3708194 | 0.556 | 3645498 | 0.547 | 94.42 | 16.05 |
| BTM16 | 5476818 | 0.822 | 5398145 | 0.810 | 95.36 | 16.29 |
| BTM17 | 4958642 | 0.744 | 4082342 | 0.612 | 95.18 | 17.56 |
| BTM20 | 6091502 | 0.914 | 5989474 | 0.898 | 91.46 | 17.39 |
| BTM8 | 3273332 | 0.491 | 2868688 | 0.430 | 91.01 | 15.04 |
| BTM9 | 2601272 | 0.390 | 2518895 | 0.378 | 93.01 | 9.29 |
| CYC1 | 18381570 | 2.757 | 18051160 | 2.708 | 92.24 | 21.42 |
| CYC10 | 18711570 | 2.807 | 18513467 | 2.777 | 95.14 | 18.04 |
| CYC12 | 4033584 | 0.605 | 3959505 | 0.594 | 83.91 | 14.76 |
| CYC15 | 8167822 | 1.225 | 8052187 | 1.208 | 91.48 | 16.54 |
| CYC16 | 13164390 | 1.975 | 10372644 | 1.556 | 91.03 | 19.29 |
| CYC17 | 7173250 | 1.076 | 7060632 | 1.059 | 95.47 | 12.39 |
| CYC20 | 5617228 | 0.843 | 5237405 | 0.786 | 94.57 | 16.84 |
| CYC7 | 7943246 | 1.191 | 7746802 | 1.162 | 96.03 | 14.44 |
| HSG1 | 4429512 | 0.664 | 4351791 | 0.653 | 81.18 | 8.30 |
| HSG11 | 2981388 | 0.447 | 2887561 | 0.433 | 81.95 | 5.66 |
| HSG15 | 2250716 | 0.338 | 2214744 | 0.332 | 70.42 | 11.61 |
| HSG16 | 2059970 | 0.309 | 1930062 | 0.290 | 74.17 | 9.45 |
| HSG17 | 2372300 | 0.356 | 2343926 | 0.352 | 85.86 | 14.67 |
| HSG19 | 6500058 | 0.975 | 6432594 | 0.965 | 84.05 | 14.87 |
| HSG27 | 2221270 | 0.333 | 2183799 | 0.328 | 72.67 | 10.70 |
| HSG4 | 1726122 | 0.259 | 1679295 | 0.252 | 80.61 | 8.34 |
| JLG1 | 4164054 | 0.625 | 4042075 | 0.606 | 95.63 | 7.75 |
| JLG2 | 3507888 | 0.526 | 3404876 | 0.511 | 94.55 | 11.75 |
| JLG4 | 3142454 | 0.471 | 2959469 | 0.444 | 95.11 | 11.03 |
| JLG5 | 3100926 | 0.465 | 2822246 | 0.423 | 93.83 | 14.41 |
| JLG6 | 1987418 | 0.298 | 1864975 | 0.280 | 94.12 | 9.36 |
| JLG7 | 1895504 | 0.284 | 1773390 | 0.266 | 90.16 | 9.09 |
| JLG8 | 3409750 | 0.511 | 3042091 | 0.456 | 95.25 | 14.27 |
| JNP10 | 16967442 | 2.545 | 16714212 | 2.507 | 93.15 | 28.56 |
| JNP11 | 5068076 | 0.760 | 4935979 | 0.740 | 88.54 | 23.49 |
| JNP14 | 8601532 | 1.290 | 8502127 | 1.275 | 94.50 | 18.46 |
| JNP15 | 8700582 | 1.305 | 8562098 | 1.284 | 94.78 | 13.92 |
| JNP6 | 18484414 | 2.773 | 18234726 | 2.735 | 96.51 | 25.04 |
| JNP7 | 12148040 | 1.822 | 11972195 | 1.796 | 94.99 | 24.67 |
| JNP8 | 11450622 | 1.718 | 11273226 | 1.691 | 91.32 | 25.99 |
| JNP9 | 11915146 | 1.787 | 11715250 | 1.757 | 95.08 | 23.23 |
| LCM1 | 3389864 | 0.508 | 2665820 | 0.400 | 90.70 | 12.70 |
| LCM2 | 4353868 | 0.653 | 2330191 | 0.350 | 91.32 | 10.57 |
| LCM3 | 2163752 | 0.325 | 1994398 | 0.299 | 92.92 | 10.12 |
| LCM4 | 7071222 | 1.061 | 6561805 | 0.984 | 94.92 | 12.08 |
| LCM5 | 3089728 | 0.463 | 2868227 | 0.430 | 94.44 | 8.81 |
| LCM6 | 959726 | 0.144 | 899569 | 0.135 | 89.40 | 6.72 |
| LCM7 | 1928118 | 0.289 | 1731013 | 0.260 | 93.88 | 8.83 |
| LCM8 | 582972 | 0.087 | 531317 | 0.080 | 90.93 | 5.36 |
| LJL1 | 2325920 | 0.349 | 2284698 | 0.343 | 94.16 | 10.29 |
| LJL2 | 3459520 | 0.519 | 3014503 | 0.452 | 92.69 | 12.16 |
| LJL3 | 9044300 | 1.357 | 8883715 | 1.333 | 96.21 | 10.30 |
| LJL4 | 6420512 | 0.963 | 6011613 | 0.902 | 91.62 | 14.43 |
| LJL5 | 4164300 | 0.625 | 2604517 | 0.391 | 91.68 | 11.15 |
| LJL7 | 3842608 | 0.576 | 3728865 | 0.559 | 94.39 | 9.67 |
| LJL8 | 5574880 | 0.836 | 5190159 | 0.779 | 91.55 | 14.99 |
| LJL9 | 1973746 | 0.296 | 1901545 | 0.285 | 93.89 | 8.37 |
| LTX1 | 2927538 | 0.439 | 2296612 | 0.344 | 88.54 | 11.58 |
| LTX2 | 9017840 | 1.353 | 7697494 | 1.155 | 89.94 | 18.26 |
| LTX3 | 9253422 | 1.388 | 7406480 | 1.111 | 93.04 | 18.68 |
| LTX4 | 6688738 | 1.003 | 4555462 | 0.683 | 80.22 | 16.07 |
| LTX5 | 2377694 | 0.357 | 1822671 | 0.273 | 70.38 | 7.26 |
| LTX6 | 6839176 | 1.026 | 6274070 | 0.941 | 74.80 | 14.90 |
| LTX7 | 6618730 | 0.993 | 4778269 | 0.717 | 83.24 | 15.29 |
| LTX8 | 7468082 | 1.120 | 4791662 | 0.719 | 90.19 | 16.30 |
| LYW1 | 6751588 | 1.013 | 6677992 | 1.002 | 86.72 | 19.09 |
| LYW2 | 8543118 | 1.281 | 8440677 | 1.266 | 82.98 | 17.74 |
| LYW3 | 6637532 | 0.996 | 6552484 | 0.983 | 73.91 | 15.10 |
| LYW4 | 5491598 | 0.824 | 5416183 | 0.812 | 85.14 | 15.33 |
| LYW5 | 8567142 | 1.285 | 8404210 | 1.261 | 79.74 | 20.98 |
| LYW6 | 4510470 | 0.677 | 4447323 | 0.667 | 90.59 | 15.26 |
| LYW7 | 9260970 | 1.389 | 9142012 | 1.371 | 76.47 | 17.68 |
| NBL12 | 9864030 | 1.480 | 9658904 | 1.449 | 84.82 | 35.84 |
| NBL13 | 9269428 | 1.390 | 9053758 | 1.358 | 88.75 | 36.96 |
| NBL32 | 5124292 | 0.769 | 3217012 | 0.483 | 72.97 | 18.40 |
| NBL4 | 5797702 | 0.870 | 5018616 | 0.753 | 81.59 | 10.02 |
| NBL5 | 4458320 | 0.669 | 4193363 | 0.629 | 81.00 | 11.07 |
| NBL6 | 9972050 | 1.496 | 9809636 | 1.471 | 89.64 | 43.24 |
| NBL8 | 4792274 | 0.719 | 3413317 | 0.512 | 85.69 | 13.99 |
| TBS11 | 6405278 | 0.961 | 6304108 | 0.946 | 94.89 | 18.72 |
| TBS12 | 3785468 | 0.568 | 3730353 | 0.560 | 95.63 | 14.04 |
| TBS13 | 6235880 | 0.935 | 6138452 | 0.921 | 96.29 | 9.15 |
| TBS14 | 2187306 | 0.328 | 2053770 | 0.308 | 92.56 | 11.52 |
| TBS2 | 1906506 | 0.286 | 1863015 | 0.279 | 94.94 | 11.07 |
| TBS4 | 13504354 | 2.026 | 13289900 | 1.993 | 95.77 | 25.42 |
| TBS5 | 3445432 | 0.517 | 3349713 | 0.502 | 92.63 | 11.81 |
| TBS7 | 8413702 | 1.262 | 8189113 | 1.228 | 95.06 | 17.93 |
| WXS15 | 2266748 | 0.340 | 1928428 | 0.289 | 93.54 | 11.30 |
| WXS17 | 11736042 | 1.760 | 11294660 | 1.694 | 94.08 | 13.45 |
| WXS19 | 1750880 | 0.263 | 1631541 | 0.245 | 88.32 | 8.47 |
| WXS2 | 1887764 | 0.283 | 467807 | 0.070 | 89.10 | 5.41 |
| WXS21 | 14936480 | 2.240 | 14313084 | 2.147 | 95.48 | 21.50 |
| WXS28 | 4515108 | 0.677 | 4392777 | 0.659 | 94.91 | 13.15 |
| WXS6 | 8534442 | 1.280 | 5668006 | 0.850 | 92.35 | 13.77 |
| WXS8 | 12455934 | 1.868 | 12118408 | 1.818 | 95.37 | 10.75 |
| XHZ1 | 2795752 | 0.419 | 2724583 | 0.409 | 86.56 | 13.38 |
| XHZ2 | 4626980 | 0.694 | 4462888 | 0.669 | 95.09 | 8.90 |
| XHZ3 | 2300448 | 0.345 | 2227922 | 0.334 | 82.66 | 10.89 |
| XHZ4 | 3116924 | 0.468 | 3048453 | 0.457 | 91.00 | 13.48 |
| XHZ5 | 2564062 | 0.385 | 2455833 | 0.368 | 91.20 | 12.89 |
| XQL1 | 4688630 | 0.703 | 4592496 | 0.689 | 90.12 | 9.92 |
| XQL10 | 4851664 | 0.728 | 4801004 | 0.720 | 91.46 | 13.83 |
| XQL12 | 5941382 | 0.891 | 5810454 | 0.872 | 96.12 | 10.35 |
| XQL16 | 7357038 | 1.104 | 7218065 | 1.083 | 92.12 | 17.18 |
| XQL17 | 3402226 | 0.510 | 3271553 | 0.491 | 95.73 | 11.31 |
| XQL21 | 4719156 | 0.708 | 4657833 | 0.699 | 92.23 | 17.79 |
| XQL3 | 2182976 | 0.327 | 2069808 | 0.310 | 91.23 | 8.55 |
| XQL5 | 4945990 | 0.742 | 4871840 | 0.731 | 92.41 | 8.08 |
| YSZ1 | 13472720 | 2.021 | 13328561 | 1.999 | 92.45 | 20.84 |
| YSZ11 | 8880254 | 1.332 | 8704626 | 1.306 | 90.30 | 18.75 |
| YSZ13 | 9598890 | 1.440 | 9403107 | 1.410 | 94.38 | 14.83 |
| YSZ14 | 2894246 | 0.434 | 2850013 | 0.428 | 94.07 | 10.26 |
| YSZ2 | 15652964 | 2.348 | 15437495 | 2.316 | 91.44 | 17.69 |
| YSZ4 | 4585552 | 0.688 | 4499860 | 0.675 | 93.72 | 18.93 |
| YSZ6 | 12970904 | 1.946 | 12737618 | 1.911 | 95.11 | 14.27 |
| YSZ8 | 1989374 | 0.298 | 1934528 | 0.290 | 92.75 | 10.19 |
| YTS1 | 3965042 | 0.595 | 3556614 | 0.533 | 83.49 | 12.77 |
| YTS2 | 3515520 | 0.527 | 3329584 | 0.499 | 93.38 | 13.44 |
| YTS3 | 1163228 | 0.174 | 1056346 | 0.158 | 91.20 | 8.09 |
| YTS4 | 5311136 | 0.797 | 5087564 | 0.763 | 88.98 | 18.56 |
| YTS5 | 1980370 | 0.297 | 1757394 | 0.264 | 76.69 | 9.01 |
| YTS6 | 3856926 | 0.579 | 3703138 | 0.555 | 78.53 | 15.52 |
| YTS7 | 6089492 | 0.913 | 5877091 | 0.882 | 94.91 | 18.56 |
| YTS8 | 5221006 | 0.783 | 4642743 | 0.696 | 87.77 | 13.84 |
| ZWD17 | 2899092 | 0.435 | 1325076 | 0.199 | 90.92 | 8.66 |
| ZWD18 | 5512700 | 0.827 | 3466200 | 0.520 | 92.74 | 13.38 |
| ZWD21 | 8700216 | 1.305 | 8234661 | 1.235 | 86.62 | 18.56 |
| ZWD28 | 6483242 | 0.972 | 5975277 | 0.896 | 95.70 | 13.14 |
| ZWD32 | 9158808 | 1.374 | 7389524 | 1.108 | 94.97 | 13.12 |
| ZWD40 | 11865194 | 1.780 | 9664208 | 1.450 | 95.93 | 18.64 |
| ZWD5 | 17306724 | 2.596 | 16283304 | 2.442 | 95.97 | 21.96 |
| ZWD6 | 9997372 | 1.500 | 8951709 | 1.343 | 94.64 | 19.38 |
| Average | 6110767 | 0.917 | 5677719 | 0.852 | 90.12 | 14.65 |

**Table S4** The loading value calculated by RDA.

| Axis | Locus | Loading | Bio3 | Bio7 | Bio12 | Bio13 | Bio15 | Bio16 | Variable | Correlation |
| --- | --- | --- | --- | --- | --- | --- | --- | --- | --- | --- |
| 1 | SNP13 | -0.147732552 | -0.062200016 | 0.145973146 | -0.143419894 | 0.133712036 | 0.235556288 | 0.046010203 | Bio15 | 0.235556288 |
| 1 | SNP93 | -0.236576758 | -0.002731886 | 0.305952592 | -0.216397717 | 0.342877733 | 0.421847815 | 0.150995623 | Bio15 | 0.421847815 |
| 1 | SNP138 | -0.167499024 | -0.254414067 | -0.006546859 | -0.124851964 | 0.01677288 | 0.190969989 | 0.023077495 | Bio3 | 0.254414067 |
| 1 | SNP194 | -0.213481928 | -0.1077653 | 0.244499295 | -0.249803364 | 0.222138925 | 0.378945878 | 0.043309143 | Bio15 | 0.378945878 |
| 1 | SNP218 | -0.201664716 | 0.01804263 | 0.298162946 | -0.205044528 | 0.301596953 | 0.378931119 | 0.108990059 | Bio15 | 0.378931119 |
| 1 | SNP441 | -0.23018516 | -0.05025872 | 0.266977211 | -0.213678748 | 0.258932488 | 0.377906978 | 0.096090168 | Bio15 | 0.377906978 |
| 1 | SNP468 | -0.145115839 | -0.007188523 | 0.096277513 | -0.010777904 | 0.265140426 | 0.196297422 | 0.225227538 | Bio13 | 0.265140426 |
| 1 | SNP561 | -0.15032617 | 0.009833874 | 0.148970538 | 0.000426595 | 0.219295611 | 0.140359056 | 0.155162118 | Bio13 | 0.219295611 |
| 1 | SNP603 | -0.137106193 | 0.04595071 | 0.15112844 | -0.031184946 | 0.20559123 | 0.159317026 | 0.149226994 | Bio13 | 0.20559123 |
| 1 | SNP809 | -0.178447367 | -0.101274298 | 0.196405896 | -0.193478478 | 0.159647015 | 0.281011857 | 0.019949396 | Bio15 | 0.281011857 |
| 1 | SNP891 | -0.171281007 | 0.023768019 | 0.220319318 | -0.134276764 | 0.252495016 | 0.297469888 | 0.128398308 | Bio15 | 0.297469888 |
| 1 | SNP1192 | -0.154989521 | -0.000710523 | 0.245508372 | -0.178964174 | 0.225822312 | 0.292692034 | 0.054823823 | Bio15 | 0.292692034 |
| 1 | SNP1276 | -0.144291327 | -0.133760543 | 0.019739968 | -0.046322073 | 0.039149233 | 0.111035037 | 0.063194531 | Bio3 | 0.133760543 |
| 1 | SNP1290 | -0.138344515 | -0.32811603 | -0.136025527 | -0.067512118 | -0.190419894 | 0.025971249 | -0.064981693 | Bio3 | 0.32811603 |
| 1 | SNP1301 | -0.244298979 | 0.021857052 | 0.361198056 | -0.248393323 | 0.365358052 | 0.459041558 | 0.132031823 | Bio15 | 0.459041558 |
| 1 | SNP1373 | -0.208531992 | 0.044229604 | 0.298129354 | -0.16544376 | 0.344072939 | 0.367241566 | 0.162648788 | Bio15 | 0.367241566 |
| 1 | SNP1424 | -0.159756911 | 0.025024371 | 0.271422907 | -0.20643642 | 0.269954349 | 0.348164033 | 0.078368818 | Bio15 | 0.348164033 |
| 1 | SNP1501 | -0.150698129 | -0.173111017 | 0.057732575 | -0.137069037 | 0.012270816 | 0.18075632 | -0.014271779 | Bio15 | 0.18075632 |
| 1 | SNP1520 | -0.149079402 | 0.03398169 | 0.215138035 | -0.123641526 | 0.244020069 | 0.267883775 | 0.113826527 | Bio15 | 0.267883775 |
| 1 | SNP1536 | -0.196213384 | -0.019269829 | 0.293476113 | -0.238829376 | 0.287779878 | 0.395123387 | 0.076710138 | Bio15 | 0.395123387 |
| 1 | SNP1589 | -0.171669196 | 0.010080618 | 0.193769098 | -0.099090474 | 0.264174266 | 0.265031576 | 0.158044095 | Bio15 | 0.265031576 |
| 1 | SNP1681 | -0.145654506 | -0.143933444 | 0.0262929 | 0.000206154 | 0.067057218 | 0.05453367 | 0.076388931 | Bio3 | 0.143933444 |
| 1 | SNP1754 | -0.209392016 | -0.034244617 | 0.286980832 | -0.226102912 | 0.277852588 | 0.382504116 | 0.080116099 | Bio15 | 0.382504116 |
| 1 | SNP1896 | -0.140608468 | 0.025486002 | 0.263969543 | -0.212395236 | 0.228817981 | 0.330104611 | 0.038145727 | Bio15 | 0.330104611 |
| 1 | SNP1955 | -0.139514907 | -0.190308277 | 0.047315541 | -0.140799814 | -0.005567868 | 0.163369358 | -0.036390265 | Bio3 | 0.190308277 |
| 1 | SNP2304 | -0.196368111 | 0.073515048 | 0.354891185 | -0.229757078 | 0.275487575 | 0.372411573 | 0.058817341 | Bio15 | 0.372411573 |
| 1 | SNP2503 | -0.138928345 | -0.210138175 | 0.035074195 | -0.154470917 | -0.010581456 | 0.18033846 | -0.040357135 | Bio3 | 0.210138175 |
| 1 | SNP2724 | -0.189230607 | -0.169778981 | 0.0976959 | -0.161949455 | 0.070091026 | 0.238395854 | 0.024197932 | Bio15 | 0.238395854 |
| 1 | SNP2865 | -0.140725926 | 0.059326164 | 0.26181878 | -0.162852932 | 0.239144792 | 0.287542017 | 0.069061084 | Bio15 | 0.287542017 |
| 1 | SNP2918 | 0.167947678 | 0.034864883 | -0.037768538 | -0.082283032 | -0.174294268 | -0.083209532 | -0.225848159 | Bio16 | 0.225848159 |
| 1 | SNP2971 | -0.165095466 | -0.065468666 | 0.190559858 | -0.168813733 | 0.161164933 | 0.26029616 | 0.035450548 | Bio15 | 0.26029616 |
| 1 | SNP3278 | -0.148555557 | 0.007715482 | 0.156214591 | -0.071340976 | 0.230025693 | 0.218361086 | 0.149226994 | Bio13 | 0.230025693 |
| 1 | SNP3345 | -0.248978498 | -0.044272293 | 0.299220258 | -0.234024381 | 0.292222508 | 0.416538319 | 0.107967404 | Bio15 | 0.416538319 |
| 1 | SNP3405 | -0.180736161 | -0.268528319 | 0.104061484 | -0.236679989 | 0.042421995 | 0.271413243 | -0.067031951 | Bio15 | 0.271413243 |
| 1 | SNP3487 | -0.204098392 | 0.062417415 | 0.403454606 | -0.307937476 | 0.305248875 | 0.453579228 | 0.03002882 | Bio15 | 0.453579228 |
| 1 | SNP3679 | -0.160920019 | 0.000387077 | 0.189796654 | -0.109598192 | 0.234623989 | 0.255554806 | 0.124818624 | Bio15 | 0.255554806 |
| 1 | SNP3700 | -0.196955251 | -0.373004526 | -0.19097652 | 0.076704997 | 0.04557039 | 0.036509242 | 0.197561426 | Bio3 | 0.373004526 |
| 1 | SNP3718 | -0.159333643 | -0.350204648 | -0.165426564 | 0.043579976 | 0.011461973 | 0.022836024 | 0.124964268 | Bio3 | 0.350204648 |
| 1 | SNP3786 | -0.151172339 | 0.049384951 | 0.263265069 | -0.16995439 | 0.233768843 | 0.293801875 | 0.067307526 | Bio15 | 0.293801875 |
| 1 | SNP3926 | -0.244298979 | 0.021857052 | 0.361198056 | -0.248393323 | 0.365358052 | 0.459041558 | 0.132031823 | Bio15 | 0.459041558 |
| 1 | SNP3929 | -0.140593088 | 0.100025891 | 0.231047146 | -0.039740458 | 0.213997249 | 0.159459583 | 0.109401892 | Bio7 | 0.231047146 |
| 1 | SNP3969 | -0.187400443 | 0.022039729 | 0.230928586 | -0.104614106 | 0.262071354 | 0.272898255 | 0.1402894 | Bio15 | 0.272898255 |
| 1 | SNP3991 | -0.217212098 | -0.074780942 | 0.280946701 | -0.244329525 | 0.262071354 | 0.388677776 | 0.058617806 | Bio15 | 0.388677776 |
| 1 | SNP4071 | -0.161922145 | -0.06731346 | 0.23920721 | -0.237040664 | 0.174308295 | 0.31908915 | -0.009788105 | Bio15 | 0.31908915 |
| 1 | SNP4212 | -0.155236322 | -0.081168091 | 0.186615468 | -0.195077682 | 0.181019649 | 0.310281881 | 0.03436434 | Bio15 | 0.310281881 |
| 1 | SNP4242 | -0.163541029 | -0.004789612 | 0.208842684 | -0.134647597 | 0.218670872 | 0.266266981 | 0.092791924 | Bio15 | 0.266266981 |
| 1 | SNP4361 | -0.172757531 | -0.019015492 | 0.230519731 | -0.168111099 | 0.306393341 | 0.343466787 | 0.134638647 | Bio15 | 0.343466787 |
| 1 | SNP4491 | -0.211361776 | -0.161901579 | 0.151059108 | -0.218131009 | 0.151069957 | 0.339769141 | 0.052280746 | Bio15 | 0.339769141 |
| 1 | SNP4668 | -0.136998018 | 0.088974709 | 0.171991952 | 0.000455365 | 0.301502713 | 0.183641581 | 0.223882719 | Bio13 | 0.301502713 |
| 2 | SNP71 | -0.171900084 | -0.326598497 | -0.120979973 | -0.096679013 | -0.232678819 | -0.019596793 | -0.177468882 | Bio3 | 0.326598497 |
| 2 | SNP204 | -0.199706254 | -0.239697523 | 0.082613802 | -0.19421193 | 0.010498383 | 0.170738669 | -0.107966752 | Bio3 | 0.239697523 |
| 2 | SNP649 | -0.160417941 | -0.18785464 | -0.032597613 | -0.158040327 | -0.166610298 | 0.014235866 | -0.233137778 | Bio16 | 0.233137778 |
| 2 | SNP721 | -0.188233601 | -0.271189226 | -0.118540772 | -0.114746141 | -0.236380402 | -0.047228823 | -0.230105969 | Bio3 | 0.271189226 |
| 2 | SNP1112 | -0.188940612 | -0.215505676 | -0.140934806 | -0.012272122 | -0.180050171 | -0.116566097 | -0.147596647 | Bio3 | 0.215505676 |
| 2 | SNP1328 | -0.159452904 | -0.335362963 | -0.143415407 | -0.077743782 | -0.221165057 | -0.020831372 | -0.147514382 | Bio3 | 0.335362963 |
| 2 | SNP1346 | -0.215171105 | -0.250669512 | -0.14900385 | 0.014805721 | -0.140933882 | -0.111023559 | -0.093329386 | Bio3 | 0.250669512 |
| 2 | SNP1587 | -0.20992281 | -0.348276234 | -0.147926869 | -0.066879195 | -0.178696233 | -0.025794012 | -0.132088395 | Bio3 | 0.348276234 |
| 2 | SNP1596 | -0.199596696 | -0.369498922 | -0.215839605 | -0.007159971 | -0.256442252 | -0.109641807 | -0.125836942 | Bio3 | 0.369498922 |
| 2 | SNP1653 | -0.168639448 | -0.191424372 | -0.060993855 | -0.035309941 | -0.088761275 | -0.031567798 | -0.091680483 | Bio3 | 0.191424372 |
| 2 | SNP2265 | -0.211058716 | -0.271399776 | -0.12693566 | -0.040571908 | -0.16087981 | -0.068264138 | -0.130018017 | Bio3 | 0.271399776 |
| 2 | SNP2309 | -0.179779405 | -0.23889389 | -0.116026763 | -0.114426326 | -0.209798894 | -0.042477818 | -0.236788075 | Bio3 | 0.23889389 |
| 2 | SNP2314 | -0.188923633 | -0.355404178 | -0.210483853 | -0.005608612 | -0.309791278 | -0.135870174 | -0.180078126 | Bio3 | 0.355404178 |
| 2 | SNP2381 | -0.169266784 | -0.349221306 | -0.138987119 | -0.115259686 | -0.170552039 | 0.035649445 | -0.154273873 | Bio3 | 0.349221306 |
| 2 | SNP2382 | -0.157897607 | -0.230904193 | -0.129648129 | -0.06486983 | -0.155096828 | -0.042835633 | -0.14516285 | Bio3 | 0.230904193 |
| 2 | SNP2581 | -0.194714334 | -0.214511419 | -0.077479881 | -0.082494197 | -0.147849668 | -0.040855145 | -0.170144313 | Bio3 | 0.214511419 |
| 2 | SNP2638 | -0.159367106 | -0.126303342 | -0.123082104 | 0.045362982 | -0.198087027 | -0.190873933 | -0.125646665 | Bio13 | 0.198087027 |
| 2 | SNP2641 | -0.17411833 | -0.318937047 | -0.202990566 | -0.014113458 | -0.225666104 | -0.096824745 | -0.127585198 | Bio3 | 0.318937047 |
| 2 | SNP2788 | -0.160905212 | -0.135481435 | -0.018615759 | -0.064954202 | -0.088724355 | -0.026732375 | -0.126215623 | Bio3 | 0.135481435 |
| 2 | SNP2898 | -0.159658061 | -0.250698898 | -0.135355602 | 0.000917198 | -0.127264193 | -0.063609893 | -0.053700798 | Bio3 | 0.250698898 |
| 2 | SNP2947 | -0.174142526 | -0.194568993 | -0.154080413 | -0.025270988 | -0.216806957 | -0.135698913 | -0.185095633 | Bio13 | 0.216806957 |
| 2 | SNP3267 | -0.273414201 | -0.325315127 | -0.100979838 | -0.109596534 | -0.194935786 | -0.039250747 | -0.213458533 | Bio3 | 0.325315127 |
| 2 | SNP3297 | -0.202533948 | -0.269566419 | -0.109582048 | -0.055623366 | -0.165899285 | -0.053026381 | -0.137895292 | Bio3 | 0.269566419 |
| 2 | SNP3565 | -0.187961248 | -0.340020492 | -0.036435854 | -0.125632989 | -0.167965903 | 0.060408006 | -0.163178141 | Bio3 | 0.340020492 |
| 2 | SNP3748 | -0.160629101 | -0.252365365 | -0.165757726 | -0.023291026 | -0.187581493 | -0.086235805 | -0.135839267 | Bio3 | 0.252365365 |
| 2 | SNP3909 | -0.240306891 | -0.377205229 | -0.241207471 | 0.035906113 | -0.238615798 | -0.152025855 | -0.100955924 | Bio3 | 0.377205229 |
| 2 | SNP3945 | -0.190046184 | -0.222101804 | -0.051109968 | -0.213137245 | -0.286788657 | -0.018755698 | -0.359209334 | Bio16 | 0.359209334 |
| 2 | SNP4079 | -0.18073585 | -0.260413181 | -0.148860121 | -0.031985258 | -0.175814969 | -0.077280074 | -0.130451245 | Bio3 | 0.260413181 |
| 2 | SNP4134 | -0.1903384 | -0.284728633 | -0.202648439 | 0.006756393 | -0.196500214 | -0.120874146 | -0.115678463 | Bio3 | 0.284728633 |
| 2 | SNP4152 | -0.191801048 | -0.257460959 | -0.031675438 | -0.128536686 | -0.079264305 | 0.061961907 | -0.127546796 | Bio3 | 0.257460959 |
| 2 | SNP4286 | 0.187338082 | 0.188752806 | 0.140359091 | -0.125036084 | 0.176640122 | 0.213781381 | 0.047978232 | Bio15 | 0.213781381 |
| 2 | SNP4412 | -0.159850844 | -0.274862987 | -0.15341035 | -0.040177063 | -0.182883332 | -0.05733935 | -0.13192381 | Bio3 | 0.274862987 |
| 2 | SNP4415 | -0.159079728 | -0.247075825 | -0.141177721 | 0.002475811 | -0.248441942 | -0.129340753 | -0.155234651 | Bio13 | 0.248441942 |
| 2 | SNP4464 | -0.287465186 | -0.452449373 | -0.216571888 | -0.083494334 | -0.316229424 | -0.095884244 | -0.23611012 | Bio3 | 0.452449373 |
| 2 | SNP4593 | -0.174368579 | -0.216976782 | -0.007295264 | -0.173867304 | -0.186773531 | 0.027225902 | -0.238966525 | Bio16 | 0.238966525 |
| 3 | SNP936 | -0.127269782 | -0.313800163 | -0.24174885 | -0.011110045 | -0.289877549 | -0.075740173 | -0.129887682 | Bio3 | 0.313800163 |
| 3 | SNP1096 | -0.160900862 | -0.256618297 | -0.311216767 | 0.178264012 | -0.230995053 | -0.213579699 | 0.013183948 | Bio7 | 0.311216767 |
| 3 | SNP1237 | -0.153115448 | -0.130826529 | -0.160339264 | 0.11878576 | -0.251724989 | -0.200060856 | -0.081120077 | Bio13 | 0.251724989 |
| 3 | SNP1269 | -0.124613532 | -0.238251524 | -0.240177593 | 0.019766587 | -0.233963158 | -0.084302871 | -0.090779596 | Bio7 | 0.240177593 |
| 3 | SNP1934 | -0.126285323 | 0.047120454 | -0.070472328 | 0.288403627 | -0.010678941 | -0.241902712 | 0.146674719 | Bio12 | 0.288403627 |
| 3 | SNP2021 | -0.124761502 | -0.083837751 | -0.191768139 | 0.259901134 | -0.039059092 | -0.208652354 | 0.151999409 | Bio12 | 0.259901134 |
| 3 | SNP2232 | -0.132337103 | -0.157361032 | -0.193111996 | 0.097780548 | -0.202746527 | -0.140364022 | -0.031379692 | Bio13 | 0.202746527 |
| 3 | SNP2272 | -0.139537184 | -0.249237563 | -0.350854373 | 0.132090097 | -0.177091882 | -0.122679598 | 0.062672992 | Bio7 | 0.350854373 |
| 3 | SNP2602 | -0.123191526 | -0.174246 | -0.240618842 | 0.038223596 | -0.202089724 | -0.080231766 | -0.050416522 | Bio7 | 0.240618842 |
| 3 | SNP3153 | 0.138610046 | 0.160197484 | 0.278207112 | -0.199999954 | 0.283767942 | 0.307403723 | 0.05599549 | Bio15 | 0.307403723 |
| 3 | SNP3330 | 0.130410521 | 0.026102068 | 0.178968257 | -0.261307783 | 0.034475594 | 0.195282516 | -0.174933897 | Bio12 | 0.261307783 |
| 3 | SNP3387 | -0.151431976 | -0.061832743 | -0.195359854 | 0.323122868 | -0.038678958 | -0.262544231 | 0.182320128 | Bio12 | 0.323122868 |
| 3 | SNP3431 | -0.121257774 | -0.234735812 | -0.288740888 | 0.072136482 | -0.123618513 | -0.047721364 | 0.046941472 | Bio7 | 0.288740888 |
| 3 | SNP3643 | -0.1215762 | -0.197585827 | -0.331032721 | 0.170670062 | -0.053087511 | -0.080711065 | 0.182438044 | Bio7 | 0.331032721 |
| 3 | SNP3788 | -0.140024196 | -0.236528327 | -0.234687755 | 0.109532767 | -0.274212771 | -0.187523274 | -0.065822992 | Bio13 | 0.274212771 |
| 3 | SNP3938 | -0.124814151 | -0.161377774 | -0.278362128 | 0.154467979 | -0.197244226 | -0.197525819 | 0.005197032 | Bio7 | 0.278362128 |
| 3 | SNP4305 | -0.140168019 | -0.087423206 | -0.206870249 | 0.285429727 | -0.068546766 | -0.250574878 | 0.139126149 | Bio12 | 0.285429727 |
| 3 | SNP4521 | -0.173922763 | -0.01152439 | -0.105135065 | 0.22624077 | -0.186922615 | -0.275717508 | -0.009367542 | Bio15 | 0.275717508 |
| 4 | SNP212 | 0.122839767 | 0.038974578 | -0.119270846 | 0.226648226 | 0.091016598 | -0.159984573 | 0.197259271 | Bio12 | 0.226648226 |
| 4 | SNP568 | 0.122463508 | 0.11115224 | -0.069835134 | 0.23578364 | 0.119396748 | -0.166307929 | 0.20790865 | Bio12 | 0.23578364 |
| 4 | SNP1351 | 0.121740741 | 0.193410739 | 0.00251584 | 0.228025674 | 0.223336397 | -0.103702976 | 0.273205453 | Bio16 | 0.273205453 |
| 4 | SNP1942 | 0.123578424 | 0.156850667 | -0.050059372 | 0.252488624 | 0.131415048 | -0.169733379 | 0.211949975 | Bio12 | 0.252488624 |
| 4 | SNP2627 | 0.133554101 | 0.13590793 | -0.075009344 | 0.252936621 | 0.164611089 | -0.156115462 | 0.254349078 | Bio16 | 0.254349078 |
| 4 | SNP3110 | -0.121123692 | 0.201228208 | 0.261354055 | -0.2591254 | -0.146769772 | 0.068357155 | -0.353959644 | Bio16 | 0.353959644 |
| 4 | SNP3677 | -0.151351818 | -0.376391689 | -0.237021266 | -0.021231742 | -0.396385086 | -0.128497435 | -0.178349148 | Bio13 | 0.396385086 |
| 4 | SNP4380 | -0.124292238 | 0.116068081 | 0.178909627 | -0.237301564 | -0.179103452 | 0.058887817 | -0.335816225 | Bio16 | 0.335816225 |
| 5 | SNP11 | 0.121922354 | 0.095165075 | 0.007604277 | 0.200921634 | -0.013818885 | -0.187926237 | 0.076476444 | Bio12 | 0.200921634 |
| 5 | SNP70 | -0.131145825 | -0.404138822 | -0.251920163 | -0.005787115 | -0.3386309 | -0.12072813 | -0.133338686 | Bio3 | 0.404138822 |
| 5 | SNP399 | 0.11610654 | 0.061253103 | 0.197311631 | -0.171583854 | 0.128693142 | 0.211562044 | -0.053781021 | Bio15 | 0.211562044 |
| 5 | SNP708 | 0.118142024 | 0.216089532 | 0.087799237 | 0.052183117 | -0.157033176 | -0.206336562 | -0.179735242 | Bio3 | 0.216089532 |
| 5 | SNP851 | 0.148137658 | 0.153446411 | 0.240955522 | -0.162970259 | -0.025883513 | 0.108448274 | -0.179925548 | Bio7 | 0.240955522 |
| 5 | SNP909 | 0.122054544 | 0.152940794 | 0.322640878 | -0.258184517 | 0.193268016 | 0.338997076 | -0.057368703 | Bio15 | 0.338997076 |
| 5 | SNP975 | 0.11950109 | 0.071135083 | 0.050878548 | 0.07673053 | 0.063640644 | -0.027427505 | 0.062728589 | Bio12 | 0.07673053 |
| 5 | SNP1072 | 0.140405394 | 0.10904554 | 0.027252927 | 0.206416077 | 0.024515381 | -0.171011686 | 0.102207179 | Bio12 | 0.206416077 |
| 5 | SNP1356 | 0.11762771 | 0.024803082 | -0.026133103 | 0.207646564 | 0.038986322 | -0.137017765 | 0.145343547 | Bio12 | 0.207646564 |
| 5 | SNP1497 | 0.140267511 | 0.012424723 | -0.059375055 | 0.193430858 | -0.020649324 | -0.163144355 | 0.084221144 | Bio12 | 0.193430858 |
| 5 | SNP1500 | -0.1241654 | -0.143426023 | -0.202123971 | 0.075162884 | 0.030943647 | 0.02644315 | 0.16319453 | Bio7 | 0.202123971 |
| 5 | SNP1550 | 0.130083812 | -0.088633271 | -0.004221443 | 0.066399101 | 0.015875379 | -0.023429706 | 0.049541324 | Bio3 | 0.088633271 |
| 5 | SNP1655 | 0.117782671 | 0.082547504 | 0.112891812 | -0.038587204 | 0.064839016 | 0.069831702 | -0.011873725 | Bio7 | 0.112891812 |
| 5 | SNP2166 | 0.122188712 | 0.078917856 | 0.032571949 | 0.166636516 | 0.016060945 | -0.143200793 | 0.076730877 | Bio12 | 0.166636516 |
| 5 | SNP2471 | 0.128228401 | 0.137395076 | 0.13251987 | 0.001763592 | -0.016540252 | -0.034298859 | -0.068323574 | Bio3 | 0.137395076 |
| 5 | SNP2472 | 0.161961514 | 0.162534443 | 0.130137163 | 0.070249931 | -0.017773979 | -0.094245242 | -0.0356959 | Bio3 | 0.162534443 |
| 5 | SNP2921 | 0.110413629 | 0.07481209 | 0.037068954 | 0.14712062 | 0.031908703 | -0.102566967 | 0.089981301 | Bio12 | 0.14712062 |
| 5 | SNP2966 | -0.119914379 | -0.293586389 | -0.279845173 | 0.05167221 | -0.230010035 | -0.109137686 | -0.033706604 | Bio3 | 0.293586389 |
| 5 | SNP3096 | 0.121685382 | 0.154418012 | 0.077550409 | 0.141511125 | -0.043754576 | -0.190159108 | -0.013948376 | Bio15 | 0.190159108 |
| 5 | SNP3292 | -0.117235147 | -0.285953395 | -0.296814839 | 0.083464079 | -0.150271565 | -0.077691981 | 0.052058991 | Bio7 | 0.296814839 |
| 5 | SNP3472 | -0.140540615 | -0.284710714 | -0.143286234 | -0.065643633 | -0.202948956 | -0.002573464 | -0.08829776 | Bio3 | 0.284710714 |
| 5 | SNP3555 | 0.149582538 | 0.118287869 | 0.103066578 | 0.0635649 | 0.031680398 | -0.050614942 | 0.008992335 | Bio3 | 0.118287869 |
| 5 | SNP3717 | 0.136107735 | 0.136348415 | 0.068960911 | 0.144797903 | -0.061465131 | -0.19954002 | -0.023980634 | Bio15 | 0.19954002 |
| 5 | SNP3886 | 0.128961697 | 0.126524104 | 0.120838914 | 0.021323845 | 0.06856516 | 0.01757883 | 0.020995916 | Bio3 | 0.126524104 |
| 5 | SNP3900 | 0.131685288 | 0.11073342 | 0.060998295 | 0.109582494 | 0.026255399 | -0.082055073 | 0.047068188 | Bio3 | 0.11073342 |
| 5 | SNP3903 | 0.111148383 | 0.125644561 | 0.148343661 | 0.073400378 | 0.148220776 | 0.004227168 | 0.107344291 | Bio7 | 0.148343661 |
| 5 | SNP4140 | -0.115432636 | -0.151898266 | -0.29638566 | 0.127053552 | -0.076497465 | -0.080190743 | 0.114249182 | Bio7 | 0.29638566 |
| 5 | SNP4146 | 0.116006267 | 0.420718634 | 0.318491614 | -0.072868774 | 0.119194852 | 0.059197339 | -0.07339864 | Bio3 | 0.420718634 |
| 5 | SNP4374 | -0.121453776 | -0.104202835 | -0.308668327 | 0.217147395 | -0.062709217 | -0.155992451 | 0.17462934 | Bio7 | 0.308668327 |
| 5 | SNP4483 | -0.139384837 | -0.264385917 | -0.142370506 | -0.020463913 | -0.053829043 | 0.067473116 | 0.063730069 | Bio3 | 0.264385917 |
| 6 | SNP14 | -0.150629437 | -0.064783883 | -0.017418159 | -0.154071865 | 0.03007164 | 0.199387317 | -0.04787394 | Bio15 | 0.199387317 |
| 6 | SNP624 | 0.118357203 | 0.245657459 | 0.185341431 | -0.021449967 | -0.106845741 | -0.111221185 | -0.177236796 | Bio3 | 0.245657459 |
| 6 | SNP1436 | 0.156259448 | 0.219762531 | 0.043439576 | 0.130789733 | -0.136406425 | -0.216490641 | -0.050760681 | Bio3 | 0.219762531 |
| 6 | SNP1469 | 0.125372376 | 0.248592393 | 0.071931638 | 0.222268839 | 0.025663455 | -0.232000312 | 0.080175062 | Bio3 | 0.248592393 |
| 6 | SNP1571 | 0.143866477 | 0.327140286 | 0.135969122 | 0.106634988 | -0.006211607 | -0.173044336 | -0.016343603 | Bio3 | 0.327140286 |
| 6 | SNP2123 | 0.110688994 | 0.05438477 | -0.02231073 | 0.099848674 | -0.09345438 | -0.149983004 | -0.00241659 | Bio15 | 0.149983004 |
| 6 | SNP2227 | 0.143181156 | 0.288737597 | 0.200022344 | -0.04376004 | -0.126564555 | -0.11228479 | -0.20209245 | Bio3 | 0.288737597 |
| 6 | SNP3591 | 0.11017725 | 0.22146899 | 0.178647881 | -0.058571797 | -0.107120536 | -0.064530615 | -0.179344979 | Bio3 | 0.22146899 |
| 6 | SNP3627 | 0.108214655 | 0.130957385 | 0.072610858 | 0.067692015 | -0.029599041 | -0.097717383 | -0.003747762 | Bio3 | 0.130957385 |
| 6 | SNP3753 | 0.1101816 | 0.234914088 | 0.120728811 | 0.020219032 | -0.100809946 | -0.153240548 | -0.139875568 | Bio3 | 0.234914088 |
| 6 | SNP4151 | 0.115737686 | 0.022472953 | -0.075023478 | 0.061984422 | -0.283095797 | -0.241184298 | -0.174279658 | Bio13 | 0.283095797 |
| 6 | SNP4314 | 0.123797889 | 0.16868111 | 0.079320854 | 0.034375353 | -0.119562854 | -0.140655827 | -0.105654082 | Bio3 | 0.16868111 |

**Table S5** The *p* value calculated by LFMM.

| Locus | Adjusted  *p*-value | Variable | Locus | Adjusted *p*-value | Variable | Locus | Adjusted *p*-value | Variable |
| --- | --- | --- | --- | --- | --- | --- | --- | --- |
| 71 | 0.000724119 | Bio3 | 1290 | 0.0000795 | Bio7 | 2265 | 0.0000312 | Bio13 |
| 194 | 0.000976965 | Bio3 | 1301 | 1.77E-07 | Bio7 | 2309 | 2.29E-07 | Bio13 |
| 204 | 4.34E-11 | Bio3 | 1373 | 0.0000728 | Bio7 | 2382 | 0.0002842 | Bio13 |
| 425 | 0.000768653 | Bio3 | 1536 | 0.0002384 | Bio7 | 2581 | 1.53E-06 | Bio13 |
| 558 | 0.000205126 | Bio3 | 1681 | 0.0000205 | Bio7 | 2724 | 0.0001847 | Bio13 |
| 809 | 0.000924458 | Bio3 | 1754 | 0.0000191 | Bio7 | 2728 | 0.000985 | Bio13 |
| 1112 | 0.0000224 | Bio3 | 2304 | 8.61E-06 | Bio7 | 2788 | 0.0004075 | Bio13 |
| 1346 | 5.13E-08 | Bio3 | 2723 | 0.0001542 | Bio7 | 2849 | 0.0000308 | Bio13 |
| 1487 | 0.0000306 | Bio3 | 2724 | 0.0000212 | Bio7 | 2947 | 0.0000354 | Bio13 |
| 1550 | 0.00090698 | Bio3 | 2971 | 0.0004318 | Bio7 | 3121 | 0.000026 | Bio13 |
| 1587 | 0.000000793 | Bio3 | 3202 | 0.0001511 | Bio7 | 3267 | 2.21E-13 | Bio13 |
| 1596 | 0.0000847 | Bio3 | 3345 | 1.03E-08 | Bio7 | 3289 | 0.000067 | Bio13 |
| 1653 | 0.000039 | Bio3 | 3405 | 0.0000292 | Bio7 | 3345 | 0.000366 | Bio13 |
| 1681 | 0.0000175 | Bio3 | 3452 | 0.0001507 | Bio7 | 3452 | 0.0000127 | Bio13 |
| 1789 | 0.000215216 | Bio3 | 3487 | 0.0000038 | Bio7 | 3472 | 0.0000787 | Bio13 |
| 1798 | 0.0000437 | Bio3 | 3565 | 0.0000484 | Bio7 | 3677 | 9.17E-10 | Bio13 |
| 2265 | 0.00000115 | Bio3 | 3677 | 0.0000106 | Bio7 | 3748 | 0.0003638 | Bio13 |
| 2309 | 0.000379013 | Bio3 | 3700 | 3.58E-06 | Bio7 | 3893 | 0.0000808 | Bio13 |
| 2314 | 0.00013156 | Bio3 | 3718 | 0.0001524 | Bio7 | 3945 | 0.000197 | Bio13 |
| 2322 | 0.000195014 | Bio3 | 3878 | 0.0002524 | Bio7 | 3966 | 0.0004172 | Bio13 |
| 2361 | 0.0000574 | Bio3 | 3926 | 1.02E-07 | Bio7 | 4118 | 0.0001439 | Bio13 |
| 2381 | 0.000123455 | Bio3 | 3969 | 0.0003684 | Bio7 | 4134 | 0.0000599 | Bio13 |
| 2433 | 0.0000208 | Bio3 | 3991 | 2.66E-06 | Bio7 | 4152 | 0.0000492 | Bio13 |
| 2581 | 0.0000186 | Bio3 | 4071 | 0.0005544 | Bio7 | 4464 | 7.25E-07 | Bio13 |
| 2641 | 0.000456371 | Bio3 | 4286 | 0.0009243 | Bio7 | 4483 | 0.0001276 | Bio13 |
| 2720 | 0.000911262 | Bio3 | 4491 | 0.0000183 | Bio7 | 4491 | 0.0000796 | Bio13 |
| 2788 | 0.000416839 | Bio3 | 70 | 0.0003217 | Bio12 | 14 | 0.0001115 | Bio15 |
| 2898 | 0.000591139 | Bio3 | 975 | 0.0009577 | Bio12 | 70 | 0.0009091 | Bio15 |
| 3032 | 0.000191627 | Bio3 | 1072 | 0.0001757 | Bio12 | 851 | 0.0008961 | Bio15 |
| 3100 | 0.000310361 | Bio3 | 1290 | 0.0006977 | Bio12 | 1497 | 0.0003361 | Bio15 |
| 3121 | 0.0000101 | Bio3 | 1356 | 0.0004244 | Bio12 | 1649 | 0.0008987 | Bio15 |
| 3190 | 0.000000238 | Bio3 | 1497 | 5.82E-06 | Bio12 | 1934 | 0.000233 | Bio15 |
| 3267 | 3.83E-15 | Bio3 | 1550 | 0.0003189 | Bio12 | 3387 | 0.0005028 | Bio15 |
| 3297 | 0.0000127 | Bio3 | 1934 | 1.43E-06 | Bio12 | 3564 | 0.0005645 | Bio15 |
| 3405 | 0.00000176 | Bio3 | 2472 | 0.0000792 | Bio12 | 3700 | 0.0000224 | Bio15 |
| 3435 | 0.00085606 | Bio3 | 2671 | 0.0003484 | Bio12 | 3718 | 0.0002057 | Bio15 |
| 3565 | 9.75E-10 | Bio3 | 3387 | 4.85E-06 | Bio12 | 3909 | 0.0008006 | Bio15 |
| 3588 | 0.000143334 | Bio3 | 3472 | 0.0002103 | Bio12 | 4138 | 0.0009675 | Bio15 |
| 3632 | 0.0000167 | Bio3 | 3555 | 0.0001162 | Bio12 | 4464 | 0.0006315 | Bio15 |
| 3700 | 0.000000414 | Bio3 | 3564 | 0.0001919 | Bio12 | 4521 | 3.01E-07 | Bio15 |
| 3718 | 0.000000321 | Bio3 | 3677 | 0.0005062 | Bio12 | 70 | 4.58E-06 | Bio16 |
| 3893 | 0.000171377 | Bio3 | 3700 | 0.0004089 | Bio12 | 93 | 0.0002807 | Bio16 |
| 3909 | 6.49E-09 | Bio3 | 3900 | 0.0005424 | Bio12 | 1290 | 1.51E-06 | Bio16 |
| 3966 | 0.000756232 | Bio3 | 4305 | 0.0000638 | Bio12 | 1497 | 0.000046 | Bio16 |
| 3991 | 0.0000835 | Bio3 | 4521 | 3.28E-09 | Bio12 | 1550 | 0.000867 | Bio16 |
| 4079 | 0.000623117 | Bio3 | 4581 | 0.0004261 | Bio12 | 1934 | 0.0000813 | Bio16 |
| 4134 | 0.000182742 | Bio3 | 70 | 0.0001301 | Bio13 | 2309 | 0.0008479 | Bio16 |
| 4152 | 0.000000515 | Bio3 | 199 | 0.0002965 | Bio13 | 2671 | 0.0002788 | Bio16 |
| 4286 | 0.000000561 | Bio3 | 204 | 0.0001125 | Bio13 | 2724 | 0.0001909 | Bio16 |
| 4365 | 0.000146124 | Bio3 | 332 | 0.0001354 | Bio13 | 3387 | 0.0000572 | Bio16 |
| 4464 | 5.57E-14 | Bio3 | 642 | 0.0004504 | Bio13 | 3452 | 0.0000136 | Bio16 |
| 4593 | 0.000834102 | Bio3 | 649 | 0.0001851 | Bio13 | 3472 | 3.62E-06 | Bio16 |
| 14 | 0.000431514 | Bio7 | 779 | 0.0007874 | Bio13 | 3564 | 0.0001139 | Bio16 |
| 70 | 0.0000519 | Bio7 | 1112 | 5.01E-06 | Bio13 | 3677 | 1.09E-07 | Bio16 |
| 93 | 0.000000947 | Bio7 | 1290 | 3.14E-06 | Bio13 | 3700 | 0.0001617 | Bio16 |
| 194 | 0.00000775 | Bio7 | 1346 | 1.32E-07 | Bio13 | 4305 | 0.0001677 | Bio16 |
| 204 | 0.000328215 | Bio7 | 1436 | 0.0001094 | Bio13 | 4483 | 0.0000301 | Bio16 |
| 218 | 0.000102145 | Bio7 | 1587 | 0.0008851 | Bio13 | 4491 | 0.0000596 | Bio16 |
| 441 | 0.000000856 | Bio7 | 1653 | 0.0000823 | Bio13 | 4521 | 8.01E-06 | Bio16 |
| 809 | 0.0000792 | Bio7 | 1798 | 0.0000018 | Bio13 | 4581 | 0.000181 | Bio16 |

**Table S6** The *p*-value calculated using PCAdapt.

| Locus | Adjusted *p*-value | Locus | Adjusted *p*-value | Locus | Adjusted *p*-value |
| --- | --- | --- | --- | --- | --- |
| SNP28 | 6.07E-13 | SNP1414 | 0.0052568 | SNP3393 | 0.0003098 |
| SNP30 | 0.00000157 | SNP1417 | 0.0015785 | SNP3407 | 0.0001297 |
| SNP36 | 0.000000494 | SNP1435 | 0.0002889 | SNP3415 | 0.0000014 |
| SNP54 | 0.00044576 | SNP1502 | 0.0018483 | SNP3437 | 0.0002587 |
| SNP58 | 4.32E-21 | SNP1513 | 0.0018483 | SNP3536 | 2.91E-08 |
| SNP63 | 0.007027894 | SNP1559 | 0.016294 | SNP3608 | 0.0000834 |
| SNP70 | 0.013773873 | SNP1580 | 0.0005265 | SNP3652 | 8.88E-14 |
| SNP89 | 0.012170187 | SNP1588 | 0.0092527 | SNP3655 | 0.0020896 |
| SNP110 | 5.81E-10 | SNP1589 | 2.32E-06 | SNP3700 | 0.0025489 |
| SNP172 | 0.007286772 | SNP1590 | 0.0093443 | SNP3708 | 0.0095288 |
| SNP174 | 0.007582011 | SNP1592 | 0.0001011 | SNP3709 | 0.0086602 |
| SNP216 | 3.68E-13 | SNP1596 | 0.0042131 | SNP3751 | 0.0027748 |
| SNP281 | 0.007064784 | SNP1600 | 0.006083 | SNP3776 | 0.0148478 |
| SNP287 | 0.000011 | SNP1609 | 0.000092 | SNP3800 | 0.0121702 |
| SNP297 | 0.000305945 | SNP1610 | 0.0025489 | SNP3825 | 0.0008342 |
| SNP302 | 4.85E-09 | SNP1626 | 0.015179 | SNP3844 | 2.14E-07 |
| SNP329 | 0.00000418 | SNP1629 | 0.0019884 | SNP3845 | 0.0032769 |
| SNP330 | 0.000000144 | SNP1666 | 0.0046878 | SNP3847 | 0.0000025 |
| SNP337 | 7.16E-11 | SNP1694 | 2.08E-10 | SNP3861 | 0.0013061 |
| SNP342 | 4.22E-10 | SNP1704 | 0.0067141 | SNP3884 | 3.55E-07 |
| SNP352 | 0.0000863 | SNP1713 | 0.0011724 | SNP3894 | 1.06E-12 |
| SNP368 | 8.88E-14 | SNP1726 | 0.0013061 | SNP3895 | 0.0001739 |
| SNP379 | 0.00000811 | SNP1752 | 2.06E-10 | SNP3901 | 4.44E-13 |
| SNP384 | 8.88E-14 | SNP1755 | 0.0015548 | SNP3911 | 2.57E-08 |
| SNP385 | 0.007286772 | SNP1788 | 0.016122 | SNP3921 | 0.0086629 |
| SNP390 | 0.0000148 | SNP1818 | 2.73E-08 | SNP3926 | 0.0038917 |
| SNP444 | 0.000000747 | SNP1837 | 0.0018483 | SNP3951 | 4.46E-16 |
| SNP460 | 5.31E-09 | SNP1870 | 2.08E-10 | SNP3958 | 8.07E-07 |
| SNP518 | 0.015607635 | SNP1871 | 3.92E-21 | SNP4006 | 0.0022338 |
| SNP532 | 0.002179882 | SNP1881 | 0.0000416 | SNP4033 | 0.0081054 |
| SNP543 | 0.00000002 | SNP1883 | 7.42E-13 | SNP4037 | 0.0159231 |
| SNP553 | 0.0000223 | SNP1884 | 0.00093 | SNP4053 | 0.0104199 |
| SNP558 | 0.001465217 | SNP1920 | 0.0001171 | SNP4089 | 0.0031657 |
| SNP570 | 0.000532528 | SNP1948 | 5.61E-13 | SNP4116 | 0.0056005 |
| SNP571 | 0.00000307 | SNP1954 | 0.0026404 | SNP4142 | 2.32E-06 |
| SNP581 | 1.78E-10 | SNP1973 | 0.0000063 | SNP4167 | 0.0000233 |
| SNP586 | 0.00000863 | SNP1979 | 0.0023884 | SNP4202 | 0.0062783 |
| SNP588 | 0.013226115 | SNP2007 | 0.0093009 | SNP4231 | 0.0038587 |
| SNP594 | 0.000330082 | SNP2028 | 0.0000938 | SNP4262 | 0.0008342 |
| SNP629 | 3.31E-12 | SNP2047 | 3.12E-07 | SNP4277 | 0.0001 |
| SNP634 | 0.006669252 | SNP2094 | 0.0123363 | SNP4282 | 1.86E-12 |
| SNP641 | 0.005202488 | SNP2095 | 3.21E-08 | SNP4286 | 5.34E-06 |
| SNP667 | 0.006565508 | SNP2192 | 1.86E-12 | SNP4311 | 7.23E-09 |
| SNP670 | 0.000133079 | SNP2217 | 0.0083064 | SNP4319 | 0.0040339 |
| SNP672 | 0.000387377 | SNP2289 | 0.0083644 | SNP4329 | 6.06E-07 |
| SNP696 | 1.18E-12 | SNP2400 | 3.5E-07 | SNP4332 | 5.81E-10 |
| SNP697 | 2.96E-08 | SNP2444 | 8.81E-07 | SNP4338 | 3.01E-13 |
| SNP702 | 0.000046 | SNP2445 | 0.0000018 | SNP4340 | 2.04E-07 |
| SNP703 | 0.001684458 | SNP2481 | 0.0003097 | SNP4344 | 1.53E-08 |
| SNP711 | 0.005263426 | SNP2535 | 0.0035935 | SNP4347 | 3.15E-10 |
| SNP712 | 0.002130722 | SNP2544 | 1.14E-09 | SNP4358 | 0.0121702 |
| SNP723 | 0.000321029 | SNP2545 | 0.0001058 | SNP4359 | 6.08E-08 |
| SNP727 | 0.000321029 | SNP2546 | 1.74E-07 | SNP4367 | 1.86E-12 |
| SNP730 | 0.000000165 | SNP2578 | 0.0051157 | SNP4369 | 2.15E-08 |
| SNP732 | 0.0000919 | SNP2602 | 3.01E-13 | SNP4373 | 0.0026637 |
| SNP783 | 0.00000743 | SNP2617 | 0.0000022 | SNP4376 | 0.0002721 |
| SNP820 | 0.013989025 | SNP2622 | 0.0005619 | SNP4381 | 0.0000755 |
| SNP843 | 0.000829865 | SNP2623 | 0.0022251 | SNP4382 | 0.000183 |
| SNP846 | 0.002179882 | SNP2624 | 4.12E-07 | SNP4388 | 5.34E-06 |
| SNP847 | 0.001742181 | SNP2639 | 0.0129988 | SNP4398 | 0.0093171 |
| SNP863 | 0.000340449 | SNP2645 | 0.0065685 | SNP4402 | 4.33E-08 |
| SNP871 | 0.007286772 | SNP2657 | 8.27E-17 | SNP4407 | 0.0074258 |
| SNP874 | 0.00479037 | SNP2660 | 1.45E-13 | SNP4409 | 3.71E-07 |
| SNP889 | 0.001080013 | SNP2662 | 0.0093149 | SNP4413 | 3.68E-13 |
| SNP893 | 0.000293957 | SNP2678 | 0.0052771 | SNP4417 | 0.0000033 |
| SNP899 | 0.000365917 | SNP2695 | 2.98E-07 | SNP4421 | 5.2E-16 |
| SNP930 | 0.000159742 | SNP2707 | 0.0049081 | SNP4428 | 4.49E-13 |
| SNP1041 | 0.003048697 | SNP2718 | 0.004295 | SNP4432 | 1.9E-08 |
| SNP1059 | 0.000000163 | SNP2745 | 0.0018965 | SNP4447 | 2.32E-06 |
| SNP1082 | 0.0004896 | SNP2760 | 0.0011716 | SNP4453 | 0.0004354 |
| SNP1090 | 0.001684458 | SNP2788 | 0.0001297 | SNP4466 | 4.89E-06 |
| SNP1130 | 0.00000856 | SNP2792 | 0.0026637 | SNP4467 | 0.0000231 |
| SNP1142 | 0.005561383 | SNP2801 | 1.02E-19 | SNP4469 | 0.010216 |
| SNP1146 | 0.000613543 | SNP2804 | 0.0001038 | SNP4475 | 2E-08 |
| SNP1153 | 0.000000747 | SNP2808 | 0.0048784 | SNP4488 | 0.010216 |
| SNP1168 | 6.25E-17 | SNP2812 | 0.005934 | SNP4500 | 0.013989 |
| SNP1174 | 0.002179882 | SNP2829 | 0.0049746 | SNP4522 | 5.66E-07 |
| SNP1227 | 0.001003924 | SNP2843 | 0.0037461 | SNP4524 | 0.0053543 |
| SNP1246 | 0.003504799 | SNP2847 | 0.0162917 | SNP4541 | 0.0008021 |
| SNP1251 | 0.00000633 | SNP2852 | 0.0015466 | SNP4553 | 0.0147472 |
| SNP1260 | 0.006865352 | SNP2871 | 0.0072868 | SNP4556 | 0.0026404 |
| SNP1261 | 0.004213084 | SNP2934 | 0.0036881 | SNP4572 | 0.0025489 |
| SNP1272 | 0.00000265 | SNP2983 | 0.0041727 | SNP4611 | 0.0081942 |
| SNP1280 | 4.33E-08 | SNP2998 | 2.42E-08 | SNP4615 | 0.0011872 |
| SNP1291 | 0.002016737 | SNP3003 | 0.0000863 | SNP4632 | 7.47E-07 |
| SNP1292 | 0.006983153 | SNP3060 | 0.0009366 | SNP4635 | 0.0000919 |
| SNP1295 | 1.45E-09 | SNP3071 | 0.0021309 | SNP4643 | 0.0004756 |
| SNP1300 | 0.009300901 | SNP3109 | 0.002543 | SNP4651 | 0.0021799 |
| SNP1342 | 1.78E-09 | SNP3143 | 0.0078319 | SNP4659 | 0.0002459 |
| SNP1381 | 0.000201772 | SNP3145 | 0.0021309 | SNP4664 | 0.000151 |
| SNP1382 | 0.012874078 | SNP3186 | 3.01E-13 | SNP4667 | 5.73E-14 |
| SNP1388 | 3.19E-08 | SNP3306 | 1.42E-06 |  |  |
| SNP1411 | 0.004687824 | SNP3309 | 0.0049977 |  |  |

**Table S7** Annotation results of outlier SNPs.

| Locus | Query_len | Subject_def | Subject_  accession | Subject_Min_evalue | Subject_Mean_evalue | Subject_Max_evalue |
| --- | --- | --- | --- | --- | --- | --- |
| 11 | 135 | BTB/POZ domain-containing protein DOT3-like isoform X1 [*Salvia splendens*] >gb|KAG6392757.1| hypothetical protein SASPL_146983 [*Salvia splendens*] | XP_042029507 | 6.93E-08 | 6.93E-08 | 6.93E-08 |
| 13 | 135 | linamarin synthase 2-like [*Durio zibethinus*] | XP_022773878 | 6.99E-12 | 6.99E-12 | 6.99E-12 |
| 14 | 135 | linamarin synthase 2-like [*Salvia splendens*] >gb|KAG6392749.1| hypothetical protein SASPL_146974 [*Salvia splendens*] | XP_042031189 | 3.68E-22 | 3.68E-22 | 3.68E-22 |
| 36 | 135 | protein ALTERED PHOSPHATE STARVATION RESPONSE 1 [*Sesamum angolense*] | KAK4393874 | 2.49E-20 | 2.49E-20 | 2.49E-20 |
| 54 | 135 | DNA ligase 6 isoform X4 [*Salvia miltiorrhiza*] | XP_057784286 | 5.06E-15 | 5.06E-15 | 5.06E-15 |
| 71 | 135 | subtilisin-like protease SBT1.7 isoform X2 [*Sesamum indicum*] >ref|XP_020554900.1| subtilisin-like protease SBT1.7 isoform X1 [*Sesamum indicum*] | XP_011099335 | 5.14E-20 | 5.14E-20 | 5.14E-20 |
| 216 | 117 | desiccation-related protein PCC13-62-like [*Salvia splendens*] >gb|KAG6398644.1| hypothetical protein SASPL_140111 [*Salvia splendens*] | XP_042019570 | 2.01E-09 | 2.01E-09 | 2.01E-09 |
| 218 | 135 | probable WRKY transcription factor 48 [*Salvia miltiorrhiza*] | XP_057806105 | 1.36E-11 | 1.36E-11 | 1.36E-11 |
| 441 | 135 | multidrug resistance-associated protein 5 [*Perilla frutescens* var. *hirtella*] | KAH6821282 | 2.04E-17 | 2.04E-17 | 2.04E-17 |
| 444 | 135 | receptor-like serine/threonine-protein kinase ALE2 isoform X1 [*Salvia hispanica*] | XP_047981209 | 5.03E-18 | 5.03E-18 | 5.03E-18 |
| 568 | 135 | COP1-interacting protein 7 isoform X3 [*Salvia miltiorrhiza*] | XP_057783522 | 1.72E-17 | 1.72E-17 | 1.72E-17 |
| 809 | 135 | nucleobase-ascorbate transporter 6-like isoform X2 [*Salvia splendens*] | XP_041996168 | 0.00000824 | 0.00000824 | 8.24E-06 |
| 843 | 135 | pectin methylesterase 1 [*Perilla frutescens* var. *hirtella*] | KAH6821838 | 6.82E-17 | 6.82E-17 | 6.82E-17 |
| 863 | 135 | putative late blight resistance protein homolog R1A-3 [*Salvia splendens*] | XP_042029844 | 5.65E-09 | 5.65E-09 | 5.65E-09 |
| 1142 | 135 | PROTEASE FAMILY C26 GAMMA-GLUTAMYL HYDROLASE, partial [*Salix koriyanagi*] | KAJ6776190 | 1.63E-20 | 1.63E-20 | 1.63E-20 |
| 1153 | 135 | Lactoylglutathione lyase [*Pisum sativum*] >gb|KAI5433450.1| Lactoylglutathione lyase [*Pisum sativum*] >gb|KAI5444651.1| Lactoylglutathione lyase [*Pisum sativum*] | KAI5423173 | 2.43E-17 | 2.43E-17 | 2.43E-17 |
| 1269 | 135 | NifU-like protein 3, chloroplastic [*Vitis vinifera*] | RVW30287 | 4.54E-14 | 4.54E-14 | 4.54E-14 |
| 1272 | 135 | cytochrome P450 CYP72A219-like [*Salvia hispanica*] | XP_047943991 | 3.56E-16 | 3.56E-16 | 3.56E-16 |
| 1301 | 135 | PREDICTED: zinc finger protein NUTCRACKER isoform X2 [*Erythranthe guttata*] >gb|EYU42150.1| hypothetical protein MIMGU_mgv1a006193mg [*Erythranthe guttata*] | XP_012831644 | 0.000000246 | 0.000000246 | 2.46E-07 |
| 1417 | 135 | cyclic nucleotide gated channel 1 [*Perilla frutescens* var. *hirtella*] >gb|KAH6828071.1| cyclic nucleotide gated channel 1 [*Perilla frutescens* var. *hirtella*] | KAH6769552 | 8.81E-19 | 8.81E-19 | 8.81E-19 |
| 1536 | 135 | aspartate aminotransferase, cytoplasmic-like [*Salvia splendens*] >gb|KAG6417120.1| hypothetical protein SASPL_119270 [*Salvia splendens*] | XP_041990157 | 7.97E-13 | 7.97E-13 | 7.97E-13 |
| 1596 | 135 | wall-associated receptor kinase-like 3 isoform X1 [*Potentilla anserina*] | XP_050383013 | 3.78E-18 | 3.78E-18 | 3.78E-18 |
| 1649 | 135 | ARABIDILLO-1 [*Perilla frutescens* var. *frutescens*] | KAH6813091 | 5.13E-17 | 5.13E-17 | 5.13E-17 |
| 1694 | 135 | pyrophosphorylase 3 [*Perilla frutescens* var. *hirtella*] | KAH6778752 | 3.71E-07 | 3.71E-07 | 3.71E-07 |
| 1754 | 135 | muscle M-line assembly protein unc-89-like [*Hibiscus syriacus*] | XP_038992127 | 1.19E-10 | 1.19E-10 | 1.19E-10 |
| 1788 | 135 | cytochrome P450 CYP72A294 [*Plectranthus barbatus*] | AMZ03389 | 4.22E-19 | 4.22E-19 | 4.22E-19 |
| 1883 | 135 | chromosome-partitioning protein [*Perilla frutescens* var. *hirtella*] | KAH6827357 | 1.24E-08 | 1.24E-08 | 1.24E-08 |
| 1896 | 135 | Leucine-rich receptor-like protein kinase family protein [*Perilla frutescens* var. *hirtella*] | KAH6826210 | 0.00000237 | 0.00000237 | 2.37E-06 |
| 1942 | 135 | NADPH-cytochrome P450 reductase [*Ocimum basilicum*] | ANW46531 | 0.00000217 | 0.00000217 | 2.17E-06 |
| 2028 | 135 | loganic acid O-methyltransferase-like [*Andrographis paniculata*] | XP_051152269 | 2.01E-18 | 2.01E-18 | 2.01E-18 |
| 2123 | 135 | putative F-box protein At5g52610 [*Salvia hispanica*] | XP_047962415 | 4.11E-15 | 4.11E-15 | 4.11E-15 |
| 2227 | 135 | putative F-box/LRR-repeat protein 8 [*Salvia miltiorrhiza*] | XP_057786672 | 7.55E-21 | 7.55E-21 | 7.55E-21 |
| 2272 | 135 | LRR receptor-like serine/threonine-protein kinase FLS2 [*Salvia miltiorrhiza*] | XP_057810901 | 1.82E-11 | 1.82E-11 | 1.82E-11 |
| 2400 | 135 | ABC transporter [*Salvia miltiorrhiza*] | QVT92312 | 6.52E-20 | 6.52E-20 | 6.52E-20 |
| 2581 | 135 | ATP-dependent 6-phosphofructokinase 4, chloroplastic [*Manihot esculenta*] >gb|OAY30538.1| hypothetical protein MANES_14G038800v8 [*Manihot esculenta*] | XP_021634662 | 0.00000525 | 0.00000525 | 5.25E-06 |
| 2627 | 135 | alpha-1,3-arabinosyltransferase XAT3-like [*Salvia hispanica*] | XP_047975689 | 4.95E-15 | 4.95E-15 | 4.95E-15 |
| 2645 | 135 | ABC transporter C family member 3-like isoform X2 [*Salvia miltiorrhiza*] | XP_057765496 | 4.00E-14 | 4.00E-14 | 4.00E-14 |
| 2678 | 135 | movement protein [*Sesamum angolense*] | KAK4409893 | 1.55E-09 | 1.55E-09 | 1.55E-09 |
| 2720 | 135 | G-type lectin S-receptor-like serine/threonine-protein kinase SD1-1 isoform X2 [*Coffea arabica*] | XP_027111628 | 2.93E-15 | 2.93E-15 | 2.93E-15 |
| 2723 | 135 | Non-specific serine/threonine protein kinase [*Handroanthus impetiginosus*] | PIN02591 | 9.14E-15 | 9.14E-15 | 9.14E-15 |
| 2724 | 135 | G-type lectin S-receptor-like serine/threonine-protein kinase At4g27290 | XP_057764685 | 6.12E-18 | 6.12E-18 | 6.12E-18 |
| 2792 | 135 | ARM repeat superfamily protein [*Perilla frutescens* var. *hirtella*] | KAH6796928 | 1.34E-19 | 1.34E-19 | 1.34E-19 |
| 2812 | 135 | berberine bridge enzyme-like 8 [*Salvia hispanica*] | XP_047959493 | 3.52E-18 | 3.52E-18 | 3.52E-18 |
| 2829 | 135 | LOW protein: exocyst complex component-like protein [*Perilla frutescens* var. *frutescens*] >gb|KAH6776270.1| LOW protein: exocyst complex component-like protein [*Perilla frutescens* var. *hirtella*] | KAH6764844 | 2.76E-17 | 2.76E-17 | 2.76E-17 |
| 2849 | 135 | tRNA modification GTPase MnmE-like [*Salvia splendens*] | XP_042033502 | 5.07E-14 | 5.07E-14 | 5.07E-14 |
| 2852 | 135 | TELO2-interacting protein 1 homolog isoform X3 [*Salvia hispanica*] | XP_047979927 | 1.01E-08 | 1.01E-08 | 1.01E-08 |
| 2918 | 135 | kinesin-like protein KIN-10C [*Salvia miltiorrhiza*] | XP_057778908 | 1.13E-09 | 1.13E-09 | 1.13E-09 |
| 2934 | 135 | 7-hydroxymethyl chlorophyll a reductase, chloroplastic isoform X2 [*Salvia miltiorrhiza*] | XP_057772225 | 4.31E-14 | 4.31E-14 | 4.31E-14 |
| 3100 | 135 | BEL1-like homeodomain protein 4 [*Salvia miltiorrhiza*] >ref|XP_057765975.1| BEL1-like homeodomain protein 4 [*Salvia miltiorrhiza*] | XP_057765974 | 0.00000012 | 0.00000012 | 1.2E-07 |
| 3109 | 134 | transcription factor HBP-1b(C38)-like [Arachis hypogaea] | QHO30872 | 1.42E-09 | 1.42E-09 | 1.42E-09 |
| 3278 | 135 | Pectin lyase-like superfamily protein [*Perilla frutescens* var. *hirtella*] | KAH6797745 | 1.42E-19 | 1.42E-19 | 1.42E-19 |
| 3289 | 135 | Concanavalin A-like lectin protein kinase family protein [*Perilla frutescens* var. *hirtella*] >gb|KAH6807346.1| Concanavalin A-like lectin protein kinase family protein [*Perilla frutescens* var. *frutescens*] | KAH6797707 | 5.08E-14 | 5.08E-14 | 5.08E-14 |
| 3309 | 135 | protein APEM9 [*Salvia miltiorrhiza*] | XP_057806541 | 0.000002563 | 0.000002563 | 2.563E-06 |
| 3345 | 135 | lysine histidine transporter 1-like isoform X1 [*Salvia splendens*] | XP_042036108 | 0.00000384 | 0.00000384 | 3.84E-06 |
| 3405 | 135 | putative late blight resistance protein homolog R1B-13 isoform X2 [*Salvia splendens*] | XP_042066290 | 2.50E-13 | 2.50E-13 | 2.50E-13 |
| 3437 | 135 | Retrovirus-related Pol polyprotein from transposon TNT 1-94 [*Cajanus cajan*] | KYP64673 | 2.42E-15 | 2.42E-15 | 2.42E-15 |
| 3452 | 135 | pentatricopeptide repeat-containing protein [*Striga asiatica*] | GER49907 | 8.53E-17 | 8.53E-17 | 8.53E-17 |
| 3591 | 135 | 15-cis-phytoene desaturase, chloroplastic/chromoplastic [*Salvia miltiorrhiza*] | XP_057803950 | 9.19E-19 | 9.19E-19 | 9.19E-19 |
| 3652 | 135 | tRNAse Z TRZ4, mitochondrial [*Salvia hispanica*] | XP_047960613 | 3.39E-10 | 3.39E-10 | 3.39E-10 |
| 3677 | 135 | abscisic-aldehyde oxidase-like isoform X4 [*Coffea arabica*] >ref|XP_027177600.1| abscisic-aldehyde oxidase-like isoform X2 [*Coffea eugenioides*] | XP_027104597 | 8.83E-21 | 8.83E-21 | 8.83E-21 |
| 3679 | 135 | indole-3-acetaldehyde oxidase [*Phtheirospermum japonicum*] | GFP97194 | 2.02E-23 | 2.02E-23 | 2.02E-23 |
| 3717 | 135 | Cell division cycle protein 48 [*Glycine max*] | KAH1239110 | 0.000000753 | 0.000000753 | 7.53E-07 |
| 3751 | 135 | pentatricopeptide repeat-containing protein [*Perilla frutescens* var. *hirtella*] | KAH6837204 | 2.86E-20 | 2.86E-20 | 2.86E-20 |
| 3845 | 135 | probable plastid-lipid-associated 8, chloroplastic [*Olea europaea* subsp. *europaea*] | CAA2933963 | 3.48E-09 | 3.48E-09 | 3.48E-09 |
| 3847 | 135 | DDB1-CUL4 associated factor 1 [*Perilla frutescens* var. *hirtella*] | KAH6836364 | 9.91E-21 | 9.91E-21 | 9.91E-21 |
| 3861 | 135 | Pleiotropic drug resistance protein 1 [*Spatholobus suberectus*] | TKY74693 | 3.43E-12 | 3.43E-12 | 3.43E-12 |
| 3893 | 135 | transcription termination factor MTERF9, chloroplastic-like isoform X4 [*Salvia miltiorrhiza*] | XP_057790394 | 7.47E-16 | 7.47E-16 | 7.47E-16 |
| 3894 | 135 | PREDICTED: uncharacterized protein LOC105955410 isoform X1 [*Erythranthe guttata*] >gb|EYU46853.1| hypothetical protein MIMGU_mgv1a016163mg | XP_012834582 | 2.27E-18 | 2.27E-18 | 2.27E-18 |
| 3895 | 135 | exocyst complex component SEC15B | XP_057790407 | 3.17E-19 | 3.17E-19 | 3.17E-19 |
| 3900 | 135 | isoamylase 2, chloroplastic [*Salvia miltiorrhiza*] | XP_057790443 | 0.00000289 | 0.00000289 | 2.89E-06 |
| 3903 | 135 | CTP synthase-like [*Pyrus* × *bretschneideri*] | XP_048442925 | 0.000000326 | 0.000000326 | 3.26E-07 |
| 3921 | 135 | glutathione S-transferase 6 [*Perilla frutescens* var. *frutescens*] | KAH6811143 | 9.90E-19 | 9.90E-19 | 9.90E-19 |
| 3929 | 135 | piezo-type mechanosensitive ion channel homolog isoform X2 [*Salvia splendens*] | XP_041991000 | 1.93E-19 | 1.93E-19 | 1.93E-19 |
| 3991 | 135 | DNA ligase 4 isoform X1 [*Olea europaea* var. *sylvestris*] | XP_022857518 | 7.37E-18 | 7.37E-18 | 7.37E-18 |
| 4071 | 135 | probable carotenoid cleavage dioxygenase 4, chloroplastic [*Salvia miltiorrhiza*] | XP_057766719 | 6.98E-17 | 6.98E-17 | 6.98E-17 |
| 4134 | 135 | myosin-17-like [*Olea europaea* subsp. *europaea*] | CAA2963472 | 5.99E-08 | 5.99E-08 | 5.99E-08 |
| 4314 | 135 | transcriptional elongation regulator MINIYO-like [*Salvia splendens*] >gb|KAG6413549.1| hypothetical protein SASPL_126263 [*Salvia splendens*] | XP_041997660 | 1.36E-17 | 1.36E-17 | 1.36E-17 |
| 4319 | 135 | serine/threonine-protein kinase ATR isoform X1 [*Salvia miltiorrhiza*] >ref|XP_057769185.1| serine/threonine-protein kinase ATR isoform X1 [*Salvia miltiorrhiza*] | XP_057769184 | 6.18E-23 | 6.18E-23 | 6.18E-23 |
| 4361 | 135 | allene oxide synthase [*Perilla frutescens* var. *hirtella*] | KAH6779997 | 3.50E-17 | 3.50E-17 | 3.50E-17 |
| 4365 | 135 | kinesin-like protein KIN-12D [*Salvia miltiorrhiza*] >ref|XP_057787422.1| kinesin-like protein KIN-12D [*Salvia miltiorrhiza*] | XP_057787421 | 1.20E-10 | 1.20E-10 | 1.20E-10 |
| 4367 | 135 | serine/threonine-protein kinase SRK2E [*Salvia miltiorrhiza*] >gb|AWU22324.1| SNF1-related protein kinase 2.6 [*Salvia miltiorrhiza*] | XP_057787423 | 8.53E-21 | 8.53E-21 | 8.53E-21 |
| 4374 | 135 | Non-specific serine/threonine protein kinase [*Handroanthus impetiginosus*] | PIN10395 | 3.58E-10 | 3.58E-10 | 3.58E-10 |
| 4376 | 135 | 3-methylcrotonyl-CoA carboxylase [*Perilla frutescens* var. *hirtella*] | KAH6825973 | 9.00E-21 | 9.00E-21 | 9.00E-21 |
| 4382 | 135 | cinnamyl alcohol dehydrogenase 1-like [*Salvia splendens*] | XP_042004928 | 2.53E-19 | 2.53E-19 | 2.53E-19 |
| 4415 | 135 | HAESA-like 2 [*Perilla frutescens* var. *frutescens*] | KAH6807878 | 5.25E-15 | 5.25E-15 | 5.25E-15 |
| 4464 | 135 | protein E6 [*Salvia miltiorrhiza*] | XP_057769025 | 2.39E-11 | 2.39E-11 | 2.39E-11 |
| 4483 | 135 | B-cell CLL/lymphoma 7 protein family member B-like [*Salvia splendens*] >gb|KAG6420502.1| hypothetical protein SASPL_117033 [*Salvia splendens*] | XP_042062558 | 1.39E-08 | 1.39E-08 | 1.39E-08 |
| 4521 | 135 | exonuclease DPD1, chloroplastic/mitochondrial [*Salvia miltiorrhiza*] >ref|XP_057792159.1| exonuclease DPD1, chloroplastic/mitochondrial [*Salvia miltiorrhiza*] >ref|XP_057792160.1| exonuclease DPD1, chloroplastic/mitochondrial [*Salvia miltiorrhiza*] >ref|XP_057792161.1| exonuclease DPD1, chloroplastic/mitochondrial [*Salvia miltiorrhiza*] >ref|XP_057792162.1| exonuclease DPD1, chloroplastic/mitochondrial [*Salvia miltiorrhiza*] | XP_057792158 | 8.46E-15 | 8.46E-15 | 8.46E-15 |

**Table S8** Genes with a functional description.

| Position | Locus | RDA-  GEA | LFMM-GEA | Subject_id | Gene description | Gene symbol | Function | E-value |
| --- | --- | --- | --- | --- | --- | --- | --- | --- |
| Chr12 | 11 | Bio12 |  | ref|XP_042029507.1| | BTB/POZ domain-containing protein DOT3-like | LOC121776397 | enables protein binding | 6.93E-08 |
| Chr12 | 14 | Bio15 | Bio7, Bio15 | ref|XP_042031189.1| | linamarin synthase 2-like | LOC121777923 | enables UDP-glycosyltransferase activity | 3.68E-22 |
| Chr12 | 54 |  |  | ref|XP_057784286.1| | DNA ligase 6 | LOC131001739 | enables ATP binding;enables DNA binding;enables DNA ligase (ATP) activity | 5.06E-15 |
| Chr12 | 71 | Bio3 | Bio3 | ref|XP_011099335.1| | subtilisin-like protease SBT1.7 | LOC105177784 | enables serine-type endopeptidase activity | 5.14E-20 |
| Chr12 | 218 | Bio15 | Bio7 | ref|XP_057806105.1| | probable WRKY transcription factor 48 | LOC131021042 | enables DNA-binding transcription factor activity;enables sequence-specific DNA binding | 1.36E-11 |
| Chr10 | 444 |  |  | ref|XP_047981209.1| | receptor-like serine/threonine-protein kinase ALE2 | LOC125222566 | enables ATP binding;enables protein kinase activity | 5.03E-18 |
| Chr11 | 809 | Bio15 | Bio3, Bio7 | ref|XP_041996168.1| | nucleobase-ascorbate transporter 6-like | LOC121746410 | enables transmembrane transporter activity; | 0.00000824 |
| Chr11 | 863 |  |  | ref|XP_042029844.1| | putative late blight resistance protein homolog R1A-3 | LOC121776738 | enables ADP binding | 5.65E-09 |
| Chr1 | 1153 |  |  | gb|KAI5423173.1| | glycolate oxidase-like | LOC127076649 | enables FMN binding;enables oxidoreductase activity | 2.43E-17 |
| Chr1 | 1272 |  |  | ref|XP_047943991.1| | cytochrome P450 CYP72A219-like | LOC125190681 | enables heme binding;enables iron ion binding;enables monooxygenase activity;enables oxidoreductase activity, acting on paired donors | 3.56E-16 |
| Chr1 | 1301 | Bio15 | Bio7 | ref|XP_012831644.1| | zinc finger protein NUTCRACKER | LOC105952622 | enables DNA-binding transcription factor activity | 0.000000246 |
| Chr1 | 1536 | Bio15 | Bio7 | ref|XP_041990157.1| | aspartate aminotransferase, cytoplasmic-like | LOC121741463 | enables L-aspartate:2-oxoglutarate aminotransferase activity;enables pyridoxal phosphate binding | 7.97E-13 |
| Chr1 | 1596 | Bio3 | Bio3 | ref|XP_050383013.1| | wall-associated receptor kinase-like 3 | LOC126799794 | enables ATP binding;enables calcium ion binding;enables polysaccharide binding;enables protein serine/threonine kinase activity | 3.78E-18 |
| Chr2 | 1788 |  |  | gb|AMZ03389.1| | muscle M-line assembly protein unc-89-like | LOC120115486 | enables ATP binding;enables protein serine/threonine kinase activity;enables protein tyrosine kinase activity | 4.22E-19 |
| Chr2 | 2028 |  |  | ref|XP_051152269.1| | loganic acid O-methyltransferase-like | LOC127266156 | enables S-adenosylmethionine-dependent methyltransferase activity | 2.01E-18 |
| Chr3 | 2123 | Bio15 |  | ref|XP_047962415.1| | putative F-box protein At5g52610 | LOC125207214 | enables protein binding | 4.11E-15 |
| Chr3 | 2227 | Bio3 |  | ref|XP_057786672.1| | putative F-box/LRR-repeat protein 8 | LOC131004091 | enables protein binding | 7.55E-21 |
| Chr3 | 2272 |  |  | ref|XP_057810901.1| | LRR receptor-like serine/threonine-protein kinase FLS2 | LOC131025249 | enables protein binding | 1.82E-11 |
| Chr3 | 2400 |  |  | gb|QVT92312.1| | ABC transporter B family member 19-like | LOC131016062 | enables ABC-type transporter activity;enables ATP binding;enables ATP hydrolysis activity | 6.52E-20 |
| Chr4 | 2581 | Bio3 | Bio3, Bio13 | ref|XP_021634662.1| | ATP-dependent 6-phosphofructokinase 4, chloroplastic | LOC110631218 | enables 6-phosphofructokinase activity;enables ATP binding | 0.00000525 |
| Chr4 | 2627 | Bio16 |  | ref|XP_047975689.1| | alpha-1,3-arabinosyltransferase XAT3-like | LOC125218129 | enables glycosyltransferase activity | 4.95E-15 |
| Chr4 | 2645 |  |  | ref|XP_057765496.1| | ABC transporter C family member 3-like | LOC130986199 | enables ABC-type transporter activity;enables ATP binding;enables ATP hydrolysis activity | 4.00E-14 |
| Chr4 | 2720 |  | Bio3 | ref|XP_027111628.1| | G-type lectin S-receptor-like serine/threonine-protein kinase SD1-1 | LOC113730867 | enables ATP binding;enables protein serine/threonine kinase activity | 2.93E-15 |
| Chr4 | 2724 |  | Bio7, Bio13, Bio15 | ref|XP_057764685.1| | G-type lectin S-receptor-like serine/threonine-protein kinase At4g27290 | LOC130985631 | enables ATP binding;enables protein serine/threonine kinase activity | 6.12E-18 |
| Chr5 | 2812 |  |  | ref|XP_047959493.1| | berberine bridge enzyme-like 8 | LOC125204803 | enables FAD binding;enables oxidoreductase activity | 3.52E-18 |
| Chr5 | 2849 |  | Bio13 | ref|XP_042033502.1| | tRNA modification GTPase MnmE-like | LOC121780042 | enables GTP binding;enables GTPase activity;enables protein binding | 5.07E-14 |
| Chr5 | 2852 |  |  | ref|XP_047979927.1| | TELO2-interacting protein 1 homolog | LOC125221733 | involved_in chromatin remodeling | 1.01E-08 |
| Chr5 | 2918 | Bio16 |  | ref|XP_057778908.1| | kinesin-like protein KIN-10C | LOC130997561 | enables ATP binding;enables microtubule binding;enables microtubule motor activity | 1.13E-09 |
| Chr5 | 2934 |  |  | ref|XP_057772225.1| | 7-hydroxymethyl chlorophyll a reductase, chloroplastic | LOC130991832 | enables 7-hydroxymethyl chlorophyll a reductase activity | 4.31E-14 |
| Chr5 | 3100 |  | Bio3 | ref|XP_057765974.1| | BEL1-like homeodomain protein 4 | LOC130986551 | enables DNA-binding transcription factor activity, RNA polymerase II-specific;enables RNA polymerase II cis-regulatory region sequence-specific DNA binding | 0.00000012 |
| Chr6 | 3405 | Bio15 | Bio3, Bio7 | ref|XP_042066290.1| | putative late blight resistance protein homolog R1A-10 | LOC121809630 | enables ADP binding | 2.50E-13 |
| Chr7 | 3591 | Bio3 |  | ref|XP_057803950.1| | 15-cis-phytoene desaturase, chloroplastic/chromoplastic | LOC131019425 | enables oxidoreductase activity | 9.19E-19 |
| Chr7 | 3652 |  |  | ref|XP_047960613.1| | tRNAse Z TRZ4, mitochondrial | LOC125205612 | enables 3'-tRNA processing endoribonuclease activity | 3.39E-10 |
| Chr7 | 3677 | Bio13 | Bio7, Bio12, Bio13, Bio15 | ref|XP_027104597.1| | indole-3-acetaldehyde oxidase-like | LOC113725547 | enables 2 iron, 2 sulfur cluster binding;enables FAD binding;enables iron ion binding | 8.83E-21 |
| Chr8 | 3893 |  | Bio3 | ref|XP_057790394.1| | transcription termination factor MTERF9, chloroplastic-like | LOC131007257 | enables double-stranded DNA binding | 7.47E-16 |
| Chr8 | 3895 |  |  | ref|XP_057790407.1| | exocyst complex component SEC15B | LOC131007277 | involved_in Golgi to plasma membrane transport;involved_in exocytosis;involved_in intracellular protein transport | 3.17E-19 |
| Chr8 | 3900 | Bio3 | Bio12 | ref|XP_057790443.1| | isoamylase 2, chloroplastic | LOC131007322 | enables isoamylase activity | 0.00000289 |
| Chr8 | 3903 | Bio7 |  | ref|XP_048442925.1| | CTP synthase-like | LOC103931990 | enables CTP synthase activity;enables identical protein binding | 0.000000326 |
| Chr8 | 3991 | Bio15 | Bio3, Bio7 | ref|XP_022857518.1| | DNA ligase 4 | LOC111378531 | enables ATP binding;enables DNA binding;enables DNA ligase (ATP) activity | 7.37E-18 |
| Chr8 | 4071 | Bio15 | Bio7 | ref|XP_057766719.1| | probable carotenoid cleavage dioxygenase 4, chloroplastic | LOC130987115 | enables carotenoid dioxygenase activity | 6.98E-17 |
| Chr9 | 4319 |  |  | ref|XP_057769184.1| | serine/threonine-protein kinase ATR | LOC130989247 | enables protein binding;enables protein serine/threonine kinase activity | 6.18E-23 |
| Chr9 | 4365 |  | Bio3 | ref|XP_057787421.1| | kinesin-like protein KIN-12D | LOC131004712 | enables ATP binding;enables microtubule binding;enables microtubule motor activity | 1.20E-10 |
| Chr9 | 4367 |  |  | ref|XP_057787423.1| | serine/threonine-protein kinase SRK2E | LOC131004713 | enables ATP binding;enables protein serine | 8.53E-21 |
| Chr9 | 4382 |  |  | ref|XP_042004928.1| | cinnamyl alcohol dehydrogenase 1-like | LOC121753746 | enables cinnamyl-alcohol dehydrogenase activity;enables zinc ion binding | 2.53E-19 |
| Chr9 | 4521 | Bio15 | Bio12, Bio15, Bio16 | ref|XP_057792158.1| | exonuclease DPD1, chloroplastic/mitochondrial | LOC131008999 | enables 3'-5'-DNA exonuclease activity;enables nucleic acid binding | 8.46E-15 |
